# Supplementary material
Source: ML conference proceedings conference paper supplement (https://proceedings.neurips.cc/paper_files/paper/2020/hash/2e1b24a664f5e9c18f407b2f9c73e821-Abstract.html)
Supplement: Supplementary file [file 2e1b24a664f5e9c18f407b2f9c73e821-Supplemental.pdf]

# Supplementary Materials

## A Experiment

As suggested by one reviewer, we conduct the following experiment over Cartpole in OpenAI gym to show that the actor-critic algorithm with mini-batch updates can significantly outperform that with single-sample updates. We adopt neural softmax policy with two hidden layers of the size (128, 128). We apply the natural actor-critic (NAC) algorithm for updating the policy model, respectively with a single episode and with a mini-batch of episodes with the batchsize  $B = 5$ . The learning curves are shown in Figure 1. It can be seen that NAC with mini-batch episodes for each update has considerably faster convergence speed and more stable convergence performance than NAC with single episode for each update.

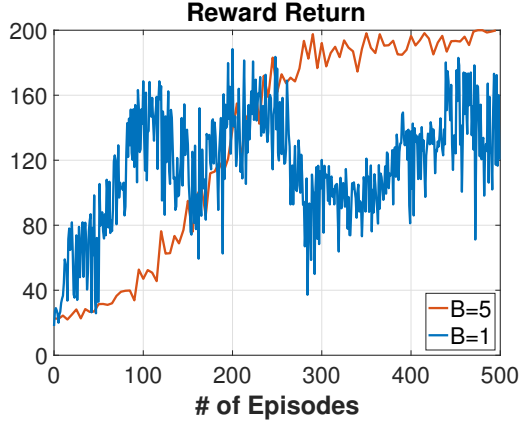

Figure 1: The average performance for NAC over 10 seeds. The red and blue lines correspond to NAC with each update sampling 5 and 1 episodes, respectively.

## B Justification of Item 3 in Assumption 1

The following lemma justifies item 3 in Assumption 1. We denote the density function of the policy  $\pi_w(\cdot|s)$  as  $\frac{\pi_w(da|s)}{da}$  (if the action space  $\mathcal{A}$  is discrete, then  $\frac{\pi_w(da|s)}{da} = \pi_w(a|s)$ ).

**Lemma 1.** Consider a policy  $\pi_w$  parametrized by  $w$ . Consider the following two cases:

1. Density function of the policy is smooth, i.e.  $\frac{\pi_w(da|s)}{da}$  is  $L_\pi$ -Lipschitz ( $0 < L_\pi < \infty$ ), and the action set is bounded, i.e.  $\int_{a \in \mathcal{A}} 1 da = C_A < \infty$ ,
2.  $\pi_w$  is the Gaussian policy, i.e.,  $\pi_w(s) = \mathcal{N}(f(w), \sigma^2)$ , with  $f(w)$  being  $L_f$ -Lipschitz ( $0 < L_f < \infty$ ).

For both cases, we have

$$\|\pi_w(\cdot|s) - \pi_{w'}(\cdot|s)\|_{TV} \leq C_\pi \|w - w'\|_2,$$

where  $C_\pi = \frac{1}{2} \max\{L_\pi C_A, \sqrt{2}L_f\}$ .

*Proof.* Without loss of generality, we only consider the case when  $\mathcal{A}$  is continuous. For the first case, we have

$$\begin{aligned} \|\pi_w(\cdot|s) - \pi_{w'}(\cdot|s)\|_{TV} &= \frac{1}{2} \int_a \left| \frac{\pi_w(da|s)}{da} - \frac{\pi_{w'}(da|s)}{da} \right| da \stackrel{(i)}{\leq} \frac{1}{2} \int_a L_\pi \|w - w'\|_2 da \\ &\leq \frac{1}{2} L_\pi C_A \|w - w'\|_2 \leq C_\pi \|w - w'\|_2, \end{aligned}$$

where (i) follows from Assumption 1. For the second case, we have

$$\begin{aligned}\|\pi_w(\cdot|s) - \pi_{w'}(\cdot|s)\|_{TV} &\leq \sqrt{\frac{1}{2}D_{KL}(\pi_w(\cdot|s), \pi_{w'}(\cdot|s))} = \sqrt{\frac{1}{2}(f(w) - f(w'))^2} \\ &= \sqrt{\frac{1}{2}L_f^2 \|w - w'\|_2^2} = \frac{\sqrt{2}}{2}L_f \|w - w'\|_2 \leq C_\pi \|w - w'\|_2.\end{aligned}$$

□

## C Proof of Proposition 1

By definition, we have

$$\begin{aligned}\nabla J(w) - \nabla J(w') &= \int_{(s,a)} Q_{\pi_w}(s,a)\phi_w(s,a)\nu_{\pi_w}(ds, da) - \int_{(s,a)} Q_{\pi_{w'}}(s,a)\phi_{w'}(s,a)\nu_{\pi_{w'}}(ds, da) \\ &= \int_{(s,a)} Q_{\pi_w}(s,a)\phi_w(s,a)\nu_{\pi_w}(ds, da) - \int_{(s,a)} Q_{\pi_w}(s,a)\phi_w(s,a)d\nu_{\pi_{w'}}(ds, da) \\ &\quad + \int_{(s,a)} Q_{\pi_w}(s,a)\phi_w(s,a)d\nu_{\pi_{w'}}(ds, da) - \int_{(s,a)} Q_{\pi_{w'}}(s,a)\phi_{w'}(s,a)d\nu_{\pi_{w'}}(ds, da) \\ &= \int_{(s,a)} Q_{\pi_w}(s,a)\phi_w(s,a)[\nu_{\pi_w}(ds, da) - \nu_{\pi_{w'}}(ds, da)] \\ &\quad + \int_{(s,a)} [Q_{\pi_w}(s,a)\phi_w(s,a) - Q_{\pi_{w'}}(s,a)\phi_w(s,a)]\nu_{\pi_{w'}}(ds, da) \\ &\quad + \int_{(s,a)} [Q_{\pi_{w'}}(s,a)\phi_w(s,a) - Q_{\pi_{w'}}(s,a)\phi_{w'}(s,a)]\nu_{\pi_{w'}}(ds, da).\end{aligned}$$

Thus, we have

$$\begin{aligned}\|\nabla J(w) - \nabla J(w')\|_2 &\leq \int_{(s,a)} \|Q_{\pi_w}(s,a)\phi_w(s,a)\|_2 |\nu_{\pi_w}(ds, da) - \nu_{\pi_{w'}}(ds, da)| \\ &\quad + \int_{(s,a)} |Q_{\pi_w}(s,a) - Q_{\pi_{w'}}(s,a)| \|\phi_w(s,a)\|_2 \nu_{\pi_{w'}}(ds, da) \\ &\quad + \int_{(s,a)} |Q_{\pi_{w'}}(s,a)| \|\phi_w(s,a) - \phi_{w'}(s,a)\|_2 \nu_{\pi_{w'}}(ds, da) \\ &\leq \frac{r_{\max}C_\phi}{1-\gamma} \int_{(s,a)} |\nu_{\pi_w}(ds, da) - \nu_{\pi_{w'}}(ds, da)| \\ &\quad + C_\phi \int_{(s,a)} |Q_{\pi_w}(s,a) - Q_{\pi_{w'}}(s,a)| \nu_{\pi_{w'}}(ds, da) \\ &\quad + \frac{r_{\max}}{1-\gamma} \int_{(s,a)} \|\phi_w(s,a) - \phi_{w'}(s,a)\|_2 \nu_{\pi_{w'}}(ds, da) \\ &\stackrel{(i)}{\leq} \frac{2r_{\max}C_\nu C_\phi}{1-\gamma} \|w - w'\|_2 + \frac{2r_{\max}C_\nu C_\phi}{1-\gamma} \|w - w'\|_2 + \frac{r_{\max}L_\phi}{1-\gamma} \|w - w'\|_2 \\ &= L_J \|w - w'\|_2,\end{aligned}$$

where (i) follows from Lemma 3, Lemma 4 and Assumption 1.

## D Proof of Theorem 1

In this section, we first provide the proof of a more general version (given as Theorem 4) of Theorem 1 for linear SA with Markovian mini-batch updates. We then show how Theorem 4 implies Theorem 1. Throughout the paper, for two matrices  $M, N \in \mathbb{R}^{d \times d}$ , we define  $\langle M, N \rangle = \sum_{i=1}^d \sum_{j=1}^d M_{i,j}N_{i,j}$ .

We consider the following linear stochastic approximation (SA) iteration with a constant stepsize:

$$\theta_{k+1} = \theta_k + \alpha \left( \frac{1}{M} \sum_{i=kM}^{(k+1)M-1} A_{x_i} \theta_k + \frac{1}{M} \sum_{i=kM}^{(k+1)M-1} b_{x_i} \right), \quad (3)$$

where  $\{x_i\}_{i \geq 0}$  is a Markov chain with state space  $\mathcal{X}$ , and  $A_{x_i} \in \mathbb{R}^{d \times d}$  and  $b_{x_i} \in \mathbb{R}^d$  are random matrix and vector associated with  $x_i$ , respectively. We define  $A = \mathbb{E}_\mu[A_x]$  and  $b = \mathbb{E}_\mu[b_x]$ , where  $\mu$  is the stationary distribution of the associated Markov chain. Then the iteration eq. (3) corresponds to the following ODE:

$$\dot{\theta} = A\theta + b. \quad (4)$$

We consider the case when the matrix  $A$  is non-singular, and we define  $\theta^* = -A^{-1}b$  as the equilibrium point of the ODE in eq. (4). We make the following standard assumptions, which are also adopted by [6, 57, 53].

**Assumption 3.** For all  $x \in \mathcal{X}$ , there exist constants such that the following hold

1. For all  $x$ , we have  $\|A_x\|_F \leq C_A$  and  $\|b_x\|_2 \leq C_b$ ,
2. There exist a positive constant  $\lambda_A$  such that for any  $\theta \in \mathbb{R}^d$ , we have  $\langle \theta - \theta^*, A(\theta - \theta^*) \rangle \leq -\frac{\lambda_A}{2} \|\theta - \theta^*\|_2^2$ ,
3. The MDP is irreducible and aperiodic, and there exist constants  $\kappa > 0$  and  $\rho \in (0, 1)$  such that

$$\sup_{x \in \mathcal{S}} \|\mathbb{P}(x_k \in \cdot | x_0) - \mu(\cdot)\|_{TV} \leq \kappa \rho^k, \quad \forall k \geq 0,$$

where  $\mu(\cdot)$  is the stationary distribution of the MDP.

It can be checked easily that if Assumption 3 holds, the equilibrium point  $\theta^*$  has bounded  $\ell_2$ -norm, i.e., there exist a positive constant  $R_\theta < \infty$  such that  $\|\theta^*\|_2 \leq R_\theta$ .

We first provide a lemma that is useful for the proof of the main theorem in this section.

**Lemma 2.** Suppose Assumption 3 holds. Consider a Markov chain  $\{x_i\}_{i \geq 0}$ . Let  $X_i$  be either  $A_{x_i}$  or  $b_{x_i}$ ,  $C_x$  be either  $C_A$  or  $C_b$ , respectively, and  $\tilde{X} = \mathbb{E}_\mu[X_x]$ . For  $t_0 \geq 0$  and  $M > 0$ , define  $X(\mathcal{M}) = \frac{1}{M} \sum_{i=t_0}^{t_0+M-1} X(s_i)$ . Then, we have

$$\mathbb{E} \left[ \left\| X(\mathcal{M}) - \tilde{X} \right\|_2^2 \right] \leq \frac{8C_x^2 [1 + (\kappa - 1)\rho]}{(1 - \rho)M}.$$

*Proof.* We proceed as follows:

$$\begin{aligned} \mathbb{E} \left[ \left\| X(\mathcal{M}) - \tilde{X} \right\|_2^2 \middle| \mathcal{F}_{t_0} \right] &\leq \mathbb{E} \left[ \left\| X(\mathcal{M}) - \tilde{X} \right\|_F^2 \middle| \mathcal{F}_{t_0} \right] = \mathbb{E} \left[ \left\| \frac{1}{M} \sum_{i=t_0}^{t_0+M-1} X(s_i) - \tilde{X} \right\|_F^2 \middle| \mathcal{F}_{t_0} \right] \\ &\leq \frac{1}{M^2} \sum_{i=t_0}^{t_0+M-1} \sum_{j=t_0}^{t_0+M-1} \mathbb{E} \left[ \langle X(s_i) - \tilde{X}, X(s_j) - \tilde{X} \rangle \middle| \mathcal{F}_{t_0} \right] \\ &\leq \frac{1}{M^2} \left[ 4MC_x^2 + \sum_{i \neq j} \mathbb{E} \left[ \langle X(s_i) - \tilde{X}, X(s_j) - \tilde{X} \rangle \middle| \mathcal{F}_{t_0} \right] \right]. \end{aligned} \quad (5)$$

Consider the term  $\mathbb{E} \left[ \langle X(s_i) - \tilde{X}, X(s_j) - \tilde{X} \rangle \middle| \mathcal{F}_{t_0} \right]$  with  $i \neq j$ . Without loss of generality, we consider the case when  $i > j$ :

$$\begin{aligned} &\mathbb{E} \left[ \langle X(s_i) - \tilde{X}, X(s_j) - \tilde{X} \rangle \middle| \mathcal{F}_{t_0} \right] \\ &= \mathbb{E} \left[ \mathbb{E}[\langle X(s_i) - \tilde{X}, X(s_j) - \tilde{X} \rangle | s_j] \middle| \mathcal{F}_{t_0} \right] = \mathbb{E} \left[ \langle \mathbb{E}[X(s_i) | x_j] - \tilde{X}, X(s_j) - \tilde{X} \rangle \middle| \mathcal{F}_{t_0} \right] \end{aligned}$$

$$\begin{aligned}
&\leq \mathbb{E} \left[ \left\| \mathbb{E}[X(s_i)|s_j] - \tilde{X} \right\|_F \left\| X(s_j) - \tilde{X} \right\|_F \middle| \mathcal{F}_{t_0} \right] \leq 2C_x \mathbb{E} \left[ \left\| \mathbb{E}[X(s_i)|s_j] - \tilde{X} \right\|_F \middle| \mathcal{F}_k \right] \\
&\stackrel{(i)}{\leq} 4C_x^2 \kappa \rho^{j-i},
\end{aligned} \tag{6}$$

where (i) follows from Assumption 3 and the fact

$$\begin{aligned}
&\left\| \mathbb{E}[X(s_i)|s_j] - \tilde{X} \right\|_F \\
&= \left\| \int_{s_i} X(s_i) P(ds_i|s_j) - \int_{s_i} X(s_i) \nu(ds_i) \right\|_F \leq \int_{s_i} \|X(s_i)\|_F |P(ds_i|s_j) - \nu(ds_i)| \\
&\leq C_x \int_{s_i} |P(ds_i|s_j) - \nu(ds_i)| \leq 2C_x \|P(\cdot|s_j) - \nu(\cdot)\|_{TV} \leq 2C_x \kappa \rho^{j-i}.
\end{aligned}$$

Substituting eq. (6) into eq. (5) yields

$$\mathbb{E} \left[ \left\| X(\mathcal{M}) - \tilde{X} \right\|_2^2 \middle| \mathcal{F}_{t_0} \right] \leq \frac{1}{M^2} \left[ 4MC_x^2 + 4C_x^2 \kappa \sum_{i \neq j} \rho^{|i-j|} \right] \leq \frac{8C_x^2 [1 + (\kappa - 1)\rho]}{(1 - \rho)M},$$

which completes the proof.  $\square$

Now we proceed to prove the main theorem. For brevity, we use  $\hat{A}_k$  and  $\hat{b}_k$  to denote  $\frac{1}{M} \sum_{i=kM}^{(k+1)M-1} A_{x_i}$  and  $\frac{1}{M} \sum_{i=kM}^{(k+1)M-1} b_{x_i}$  respectively. We also define  $g(\theta) = A\theta + b$  and  $g_k(\theta) = \hat{A}_k \theta + \hat{b}_k$ . We have the following theorem on the iteration of  $\|\theta_K - \theta^*\|_2^2$ .

**Theorem 4** (Generalized Version of Theorem 1). *Suppose Assumption 3 holds. Consider the iteration eq. (3). Let  $\alpha \leq \min\{\frac{\lambda_A}{8C_A^2}, \frac{4}{\lambda_A}\}$  and  $M \geq \left(\frac{2}{\lambda_A} + 2\alpha\right) \frac{192C_A^2 [1 + (\kappa - 1)\rho]}{(1 - \rho)\lambda_A}$ . We have*

$$\mathbb{E}[\|\theta_K - \theta^*\|_2^2] \leq \left(1 - \frac{\lambda_A}{8}\alpha\right)^K \|\theta_0 - \theta^*\|_2^2 + \left(\frac{2}{\lambda_A} + 2\alpha\right) \frac{192(C_A^2 R_\theta^2 + C_b^2)[1 + (\kappa - 1)\rho]}{(1 - \rho)\lambda_A M}.$$

If we further let  $K \geq \frac{8}{\lambda_A \alpha} \log \frac{2\|\theta_0 - \theta^*\|_2^2}{\epsilon}$  and  $M \geq \left(\frac{2}{\lambda_A} + 2\alpha\right) \frac{384(C_A^2 R_\theta^2 + C_b^2)[1 + (\kappa - 1)\rho]}{(1 - \rho)\lambda_A \epsilon}$ , then we have  $\mathbb{E}[\|\theta_K - \theta^*\|_2^2] \leq \epsilon$  with the total sample complexity given by  $KM = \mathcal{O}\left(\frac{1}{\epsilon} \log\left(\frac{1}{\epsilon}\right)\right)$ .

**Proof of Theorem 4.** We first proceed as follows:

$$\begin{aligned}
\|\theta_{k+1} - \theta^*\|_2^2 &= \|\theta_k + \alpha g_k(\theta_k) - \theta^*\|_2^2 \\
&= \|\theta_k - \theta^*\|_2^2 + 2\alpha \langle \theta_k - \theta^*, g_k(\theta_k) \rangle + \alpha^2 \|g_k(\theta_k)\|_2^2 \\
&= \|\theta_k - \theta^*\|_2^2 + 2\alpha \langle \theta_k - \theta^*, g(\theta_k) \rangle + 2\alpha \langle \theta_k - \theta^*, g_k(\theta_k) - g(\theta_k) \rangle \\
&\quad + \alpha^2 \|g_k(\theta_k) - g(\theta_k) + g(\theta_k)\|_2^2 \\
&\stackrel{(i)}{\leq} \|\theta_k - \theta^*\|_2^2 - \lambda_A \alpha \|\theta_k - \theta^*\|_2^2 + \frac{\lambda_A}{2} \alpha \|\theta_k - \theta^*\|_2^2 + \frac{2}{\lambda_A} \alpha \|g_k(\theta_k) - g(\theta_k)\|_2^2 \\
&\quad + 2\alpha^2 \|g_k(\theta_k) - g(\theta_k)\|_2 + 2\alpha^2 \|g(\theta_k)\|_2^2 \\
&\stackrel{(ii)}{\leq} \left(1 - \frac{\lambda_A}{2}\alpha + 2C_A^2 \alpha^2\right) \|\theta_k - \theta^*\|_2^2 + \left(\frac{2}{\lambda_A}\alpha + 2\alpha^2\right) \|g_k(\theta_k) - g(\theta_k)\|_2^2, \tag{7}
\end{aligned}$$

where (i) follows from the facts that

$$\langle \theta_k - \theta^*, g(\theta_k) \rangle = \langle \theta_k - \theta^*, A(\theta_k - \theta^*) \rangle \leq -\frac{\lambda_A}{2} \|\theta_k - \theta^*\|_2^2,$$

$$\langle \theta_k - \theta^*, g_k(\theta_k) - g(\theta_k) \rangle \leq \frac{\lambda_A}{4} \|\theta_k - \theta^*\|_2^2 + \frac{1}{\lambda_A} \|g_k(\theta_k) - g(\theta_k)\|_2^2,$$

and

$$\|g_k(\theta_k) - g(\theta_k) + g(\theta_k)\|_2^2 \leq 2 \|g_k(\theta_k) - g(\theta_k)\|_2^2 + 2 \|g(\theta_k)\|_2^2,$$

and (ii) follows from the fact that  $\|g(\theta_k)\|_2 = \|A(\theta_k - \theta^*)\|_2 \leq C_A \|\theta_k - \theta^*\|_2$ . Let  $\mathcal{F}_k$  be the filtration of the sample  $\{x_i\}_{0 \leq i \leq kM-1}$ . Taking expectation on both sides of eq. (7) conditioned on  $\mathcal{F}_k$  yields

$$\begin{aligned} & \mathbb{E}[\|\theta_{k+1} - \theta^*\|_2^2 | \mathcal{F}_k] \\ & \leq \left(1 - \frac{\lambda_A}{2}\alpha + 2C_A^2\alpha^2\right) \|\theta_k - \theta^*\|_2^2 + \left(\frac{2}{\lambda_A}\alpha + 2\alpha^2\right) \mathbb{E}[\|g_k(\theta_k) - g(\theta_k)\|_2^2 | \mathcal{F}_k]. \end{aligned} \quad (8)$$

Next we bound the term  $\mathbb{E}[\|g_k(\theta_k) - g(\theta_k)\|_2^2 | \mathcal{F}_k]$  in eq. (8) as follows.

$$\begin{aligned} & \mathbb{E}[\|g_k(\theta_k) - g(\theta_k)\|_2^2 | \mathcal{F}_k] \\ & = \mathbb{E} \left[ \left\| (\hat{A}_k - A)\theta_k + \hat{b}_k - b \right\|_2^2 \middle| \mathcal{F}_k \right] \\ & = \mathbb{E} \left[ \left\| (\hat{A}_k - A)(\theta_k - \theta^*) + (\hat{A}_k - A)\theta^* + \hat{b}_k - b \right\|_2^2 \middle| \mathcal{F}_k \right] \\ & \leq 3\mathbb{E} \left[ \left\| (\hat{A}_k - A)(\theta_k - \theta^*) \right\|_2^2 + \left\| (\hat{A}_k - A)\theta^* \right\|_2^2 + \left\| \hat{b}_k - b \right\|_2^2 \middle| \mathcal{F}_k \right] \\ & \leq 3\mathbb{E} \left[ \left\| \hat{A}_k - A \right\|_2^2 \middle| \mathcal{F}_k \right] \|\theta_k - \theta^*\|_2^2 + 3\mathbb{E} \left[ \left\| \hat{A}_k - A \right\|_2^2 \middle| \mathcal{F}_k \right] \|\theta^*\|_2^2 + 3\mathbb{E} \left[ \left\| \hat{b}_k - b \right\|_2^2 \middle| \mathcal{F}_k \right]. \end{aligned} \quad (9)$$

Following from Lemma 2, we obtain

$$\mathbb{E} \left[ \left\| \hat{A}_k - A \right\|_2^2 \middle| \mathcal{F}_k \right] \leq \frac{1}{M^2} \left[ 4MC_A^2 + 4C_A^2\kappa \sum_{i \neq j} \rho^{|i-j|} \right] \leq \frac{8C_A^2[1 + (\kappa - 1)\rho]}{(1 - \rho)M}, \quad (10)$$

and

$$\mathbb{E} \left[ \left\| \hat{b}_k - b \right\|_2^2 \middle| \mathcal{F}_t \right] \leq \frac{8C_b^2[1 + (\kappa - 1)\rho]}{(1 - \rho)M}. \quad (11)$$

Substituting eq. (10) and eq. (11) into eq. (9) yields

$$\mathbb{E}[\|g_k(\theta_k) - g(\theta_k)\|_2^2 | \mathcal{F}_k] \leq \frac{24C_A^2[1 + (\kappa - 1)\rho]}{(1 - \rho)M} \|\theta_k - \theta^*\|_2^2 + \frac{24(C_A^2R_\theta^2 + C_b^2)[1 + (\kappa - 1)\rho]}{(1 - \rho)M}. \quad (12)$$

Then, substituting eq. (12) into eq. (7) yields

$$\begin{aligned} \mathbb{E}[\|\theta_{k+1} - \theta^*\|_2^2 | \mathcal{F}_k] & \leq \left(1 - \frac{\lambda_A}{2}\alpha + 2C_A^2\alpha^2 + \left(\frac{2}{\lambda_A}\alpha + 2\alpha^2\right) \frac{24C_A^2[1 + (\kappa - 1)\rho]}{(1 - \rho)M}\right) \|\theta_k - \theta^*\|_2^2 \\ & \quad + \left(\frac{2}{\lambda_A}\alpha + 2\alpha^2\right) \frac{24(C_A^2R_\theta^2 + C_b^2)[1 + (\kappa - 1)\rho]}{(1 - \rho)M}. \end{aligned}$$

Letting  $\alpha \leq \frac{\lambda_A}{8C_A^2}$  and  $M \geq \left(\frac{2}{\lambda_A} + 2\alpha\right) \frac{192C_A^2[1 + (\kappa - 1)\rho]}{(1 - \rho)\lambda_A}$ , and taking expectation over  $\mathcal{F}_t$  on both sides of the above inequality yield

$$\mathbb{E}[\|\theta_{k+1} - \theta^*\|_2^2] \leq \left(1 - \frac{\lambda_A}{8}\alpha\right) \mathbb{E}[\|\theta_k - \theta^*\|_2^2] + \left(\frac{2}{\lambda_A}\alpha + 2\alpha^2\right) \frac{24(C_A^2R_\theta^2 + C_b^2)[1 + (\kappa - 1)\rho]}{(1 - \rho)M}. \quad (13)$$

Applying eq. (13) recursively from  $k = 0$  to  $K - 1$  and letting  $\alpha < \frac{8}{\lambda_A}$  yield

$$\begin{aligned} & \mathbb{E}[\|\theta_K - \theta^*\|_2^2] \\ & \leq \left(1 - \frac{\lambda_A}{8}\alpha\right)^K \|\theta_0 - \theta^*\|_2^2 + \left(\frac{2}{\lambda_A}\alpha + 2\alpha^2\right) \frac{24(C_A^2R_\theta^2 + C_b^2)[1 + (\kappa - 1)\rho]}{(1 - \rho)M} \sum_{k=0}^{K-1} \left(1 - \frac{\lambda_A}{8}\alpha\right)^k \end{aligned}$$

$$\begin{aligned}
&\leq \left(1 - \frac{\lambda_A}{8}\alpha\right)^K \|\theta_0 - \theta^*\|_2^2 + \left(\frac{2}{\lambda_A} + 2\alpha\right) \frac{192(C_A^2 R_\theta^2 + C_b^2)[1 + (\kappa - 1)\rho]}{(1 - \rho)\lambda_A M} \\
&\leq e^{-\frac{\lambda_A}{8}\alpha K} \|\theta_0 - \theta^*\|_2^2 + \left(\frac{2}{\lambda_A} + 2\alpha\right) \frac{192(C_A^2 R_\theta^2 + C_b^2)[1 + (\kappa - 1)\rho]}{(1 - \rho)\lambda_A M}. \tag{14}
\end{aligned}$$

Letting  $\alpha = \min\{\frac{\lambda_A}{8C_A^2}, \frac{4}{\lambda_A}\}$ ,  $K \geq \frac{8}{\lambda_A \alpha} \log \frac{2\|\theta_0 - \theta^*\|_2^2}{\epsilon}$  and  $M \geq \left(\frac{2}{\lambda_A} + 2\alpha\right) \frac{384(C_A^2 R_\theta^2 + C_b^2)[1 + (\kappa - 1)\rho]}{(1 - \rho)\lambda_A \epsilon}$ , we have  $\mathbb{E}[\|\theta_K - \theta^*\|_2^2] \leq \epsilon$ .  $\square$

Then, We show how to apply Theorem 4 to derive the sample complexity of Algorithm 2 given in Theorem 1.

**Proof of Theorem 1.** We define the parameters in Theorem 4 to be  $A_{x_i} = \phi(s_{t,i})(\gamma\phi(s_{t,i+1}) - \phi(s_{t,i}))^\top$ ,  $b_{x_i} = r(s_{t,i}, a_{t,i}, s_{t,i+1})\phi(s_{t,i})$  and  $K = T_c$ . Then the results of Theorem 1 follows.  $\square$

## E Supporting Lemmas for Theorem 2 and Theorem 3

In this subsection, we provide supporting lemmas, which are useful to the proof of Theorem 2.

**Lemma 3.** Consider the initialization distribution  $\eta(\cdot)$  and transition kernel  $P(\cdot|s, a)$ . Let  $\eta(\cdot) = \zeta(\cdot)$  or  $P(\cdot|\hat{s}, \hat{a})$  for any given  $(\hat{s}, \hat{a}) \in \mathcal{S} \times \mathcal{A}$ . Denote  $\nu_{\pi_w, \eta}(\cdot, \cdot)$  as the state-action visitation distribution of MDP with policy  $\pi_w$  and initialization distribution  $\eta(\cdot)$ . Suppose Assumption 2 holds. Then we have

$$\|\nu_{\pi_w, \eta}(\cdot, \cdot) - \nu_{\pi_{w'}, \eta}(\cdot, \cdot)\|_{TV} \leq C_\nu \|w - w'\|_2$$

for all  $w, w' \in \mathbb{R}^d$ , where  $C_\nu = C_\pi \left(1 + \lceil \log_\rho \kappa^{-1} \rceil + \frac{1}{1 - \rho}\right)$ .

*Proof.* The proof of this lemma is similar to the proof of Lemma 6 in [57] with the following difference. [57] considers the case with the finite action space, we extend their result to the case with possibly infinite action space. Define the transition kernel  $\tilde{P}(\cdot|s, a) = \gamma P(\cdot|s, a) + (1 - \gamma)I(\cdot)$ . Denote  $P_{\pi_w, I}(\cdot)$  as the state visitation distribution of the MDP with policy  $\pi_w$  and initialization distribution  $I(\cdot)$ , and it satisfies that  $\nu_{\pi_w, I}(s, a) = P_{\pi_w, I}(s)\pi_w(a|s)$ . [21] showed that the stationary distribution of the MDP with transition kernel  $\tilde{P}(\cdot|s, a)$  and policy  $\pi_w$  is given by  $P_{\pi_w, I}(\cdot)$ . Following from Theorem 3.1 in [29], we obtain

$$\|P_{\pi_w, I}(\cdot) - P_{\pi_{w'}, I}(\cdot)\|_{TV} \leq \left(\lceil \log_\rho \kappa^{-1} \rceil + \frac{1}{1 - \rho}\right) \|K_w - K_{w'}\|, \tag{15}$$

where  $K_w$  and  $K_{w'}$  are state to state transition kernel of MDP with policy  $\pi_w$  and  $\pi_{w'}$  respectively and  $\|\cdot\|$  is the operator norm of a transition kernel:  $\|P\| := \sup_{\|q\|_{TV}=1} \|qP\|_{TV}$ . Note here we define the total variation norm of a distribution  $q(s)$  as  $\|q\|_{TV} = \int_s |q(ds)|$ . Then we obtain

$$\begin{aligned}
\|K_w - K_{w'}\| &= \sup_{\|q\|_{TV}=1} \left\| \int_s q(ds)(K_w - K_{w'})(s, \cdot) \right\|_{TV} \\
&= \frac{1}{2} \sup_{\|q\|_{TV}=1} \int_{s'} \left| \int_s q(ds)(K_w(s, ds') - K_{w'}(s, ds')) \right| \\
&\leq \frac{1}{2} \sup_{\|q\|_{TV}=1} \int_{s'} \int_s q(ds) |K_w(s, ds') - K_{w'}(s, ds')| \\
&= \frac{1}{2} \sup_{\|q\|_{TV}=1} \int_{s'} \int_s q(ds) \left| \int_a \tilde{P}(ds'|s, a)(\pi_{w'}(da|s) - \pi_w(da|s)) \right| \\
&\leq \frac{1}{2} \sup_{\|q\|_{TV}=1} \int_s q(ds) \int_a |\pi_{w'}(da|s) - \pi_w(da|s)| \int_{s'} \tilde{P}(ds'|s, a) \\
&= \sup_{\|q\|_{TV}=1} \int_s q(ds) \|\pi_{w'}(\cdot|s) - \pi_w(\cdot|s)\|_{TV}
\end{aligned}$$

$$\stackrel{(i)}{\leq} C_\pi \|w' - w\|_2, \quad (16)$$

where (i) follows from Assumption 1. Substituting eq. (16) into eq. (15) yields

$$\|P_{\pi_w, I}(\cdot) - P_{\pi_{w'}, I}(\cdot)\|_{TV} \leq C_\pi \left( \lceil \log_\rho \kappa^{-1} \rceil + \frac{1}{1-\rho} \right) \|w' - w\|_2. \quad (17)$$

Then we bound  $\|\nu_{\pi_w, I}(\cdot, \cdot) - \nu_{\pi_{w'}, I}(\cdot, \cdot)\|_{TV}$  as follows:

$$\begin{aligned} & \|\nu_{\pi_w, I}(\cdot, \cdot) - \nu_{\pi_{w'}, I}(\cdot, \cdot)\|_{TV} \\ &= \|P_{\pi_w, I}(\cdot) \pi_w(\cdot|\cdot) - P_{\pi_{w'}, I}(\cdot) \pi_{w'}(\cdot|\cdot)\|_{TV} \\ &= \frac{1}{2} \int_s \int_a |P_{\pi_w, I}(ds) \pi_w(da|s) - P_{\pi_{w'}, I}(ds) \pi_{w'}(da|s)| \\ &= \frac{1}{2} \int_s \int_a |P_{\pi_w, I}(ds) \pi_w(da|s) - P_{\pi_w, I}(ds) \pi_{w'}(da|s) + P_{\pi_w, I}(ds) \pi_{w'}(da|s) - P_{\pi_{w'}, I}(ds) \pi_{w'}(da|s)| \\ &= \frac{1}{2} \int_s \int_a |P_{\pi_w, I}(ds) \pi_w(da|s) - P_{\pi_w, I}(ds) \pi_{w'}(da|s)| + \frac{1}{2} \int_s \int_a |P_{\pi_w, I}(ds) \pi_{w'}(da|s) - P_{\pi_{w'}, I}(ds) \pi_{w'}(da|s)| \\ &= \frac{1}{2} \int_s \int_a P_{\pi_w, I}(ds) |\pi_w(da|s) - \pi_{w'}(da|s)| + \frac{1}{2} \int_s \int_a |P_{\pi_w, I}(ds) - P_{\pi_{w'}, I}(ds)| \pi_{w'}(da|s) \\ &\stackrel{(i)}{\leq} C_\pi \|w - w'\|_2 \int_s P_{\pi_w, I}(ds) + \frac{1}{2} \int_s |P_{\pi_w, I}(ds) - P_{\pi_{w'}, I}(ds)| \\ &= C_\pi \|w - w'\|_2 + \|P_{\pi_w, I}(\cdot) - P_{\pi_{w'}, I}(\cdot)\|_{TV} \\ &\leq C_\pi \|w - w'\|_2 + C_\pi \left( \lceil \log_\rho \kappa^{-1} \rceil + \frac{1}{1-\rho} \right) \|w' - w\|_2 \\ &= C_\nu \|w' - w\|_2, \end{aligned}$$

where (i) follows from Lemma 1.  $\square$

**Lemma 4.** Suppose Assumptions 1 and 2 hold, for any  $w, w' \in \mathbb{R}^d$  and any state-action pair  $(s, a) \in \mathcal{S} \times \mathcal{A}$ . We have

$$|Q_{\pi_w}(s, a) - Q_{\pi_{w'}}(s, a)| \leq L_Q \|w - w'\|_2,$$

where  $L_Q = \frac{2r_{\max} C_\nu}{1-\gamma}$ .

*Proof.* By definition, we have  $Q_{\pi_w}(s, a) = \frac{1}{1-\gamma} \int_{(\hat{s}, \hat{a})} r(\hat{s}, \hat{a}) dP_{(s,a)}^{\pi_w}(\hat{s}, \hat{a})$ , where  $P_{(s,a)}^{\pi_w}(\hat{s}, \hat{a}) = (1-\gamma) \sum_{t=0}^{\infty} \gamma^t \mathbb{P}(s_t = \hat{s}, a_t = \hat{a} | s_0 = s, a_0 = a, \pi_w)$  is the state-action visitation distribution of the MDP with policy  $\pi_w$  and initialization distribution  $P(\cdot | s_0 = s, a_0 = a)$ . Thus,  $P_{(s,a)}^{\pi_w}(\hat{s}, \hat{a})$  is also the state-action stationary distribution of the MDP with policy  $\pi_w$  and transition kernel  $\tilde{P}(\cdot | s, a) = \gamma P(\cdot | s, a) + (1-\gamma) P(\cdot | s_0 = s, a_0 = a)$ . We denote  $P_s^{\pi_w}(\hat{s})$  as the state stationary distribution for such a MDP. It then follows that

$$\begin{aligned} & |Q_{\pi_w}(s, a) - Q_{\pi_{w'}}(s, a)| \\ &= \frac{1}{1-\gamma} \left| \int_{(\hat{s}, \hat{a})} r(\hat{s}, \hat{a}) P_{(s,a)}^{\pi_w}(d\hat{s}, d\hat{a}) - \int_{(\hat{s}, \hat{a})} r(\hat{s}, \hat{a}) dP_{(s,a)}^{\pi_{w'}}(d\hat{s}, d\hat{a}) \right| \\ &\leq \frac{1}{1-\gamma} \int_{(\hat{s}, \hat{a})} r(\hat{s}, \hat{a}) \left| P_{(s,a)}^{\pi_w}(d\hat{s}, d\hat{a}) - P_{(s,a)}^{\pi_{w'}}(d\hat{s}, d\hat{a}) \right| \\ &\leq \frac{2r_{\max}}{1-\gamma} \|P_{(s,a)}^{\pi_w}(\cdot, \cdot) - P_{(s,a)}^{\pi_{w'}}(\cdot, \cdot)\|_{TV} \\ &\stackrel{(i)}{\leq} \frac{2r_{\max} C_\nu}{1-\gamma} \|w - w'\|_2, \end{aligned}$$

where (i) follows from Lemma 3.  $\square$

**Lemma 5.** Suppose Assumptions 1 hold, for  $w', w'' \in \mathbb{R}^d$ . We have

$$\left\| \nabla_w \mathbb{E}_{\nu_{\pi^*}} \left[ \log \pi_{w'}(a, s) \right] - \nabla_w \mathbb{E}_{\nu_{\pi^*}} \left[ \log \pi_{w''}(a, s) \right] \right\|_2 \leq L_\psi \|w' - w''\|_2.$$

*Proof.* By definition, we obtain

$$\begin{aligned} & \left\| \nabla_w \mathbb{E}_{\nu_{\pi^*}} \left[ \log \pi_{w'}(a, s) \right] - \nabla_w \mathbb{E}_{\nu_{\pi^*}} \left[ \log \pi_{w''}(a, s) \right] \right\|_2 \\ &= \left\| \int_{(s,a)} \psi_{w'}(s, a) \nu_{\pi^*}(ds, da) - \int_{(s,a)} \psi_{w''}(s, a) \nu_{\pi^*}(ds, da) \right\|_2 \\ &\leq \int_{(s,a)} \|\psi_{w'}(s, a) - \psi_{w''}(s, a)\|_2 \nu_{\pi^*}(ds, da) \\ &\stackrel{(i)}{\leq} \int_{(s,a)} L_\psi \|w' - w''\|_2 \nu_{\pi^*}(ds, da) = L_\psi \|w' - w''\|_2, \end{aligned}$$

where (i) follows from Assumption 1.  $\square$

**Lemma 6.** For any  $w \in \mathbb{R}^d$ , define  $\theta_w^* = (F(w) + \lambda I)^{-1} \nabla J(w)$  and  $\theta_w^\dagger = F(w)^\dagger \nabla J(w)$ . We have  $\|\theta_w^* - \theta_w^\dagger\|_2 \leq C_r \lambda$ , where  $0 < C_r < +\infty$  is a constant only depending on the policy class.

*Proof.* By definition,  $F(w) \in \mathbb{R}^{d \times d}$  is a symmetric matrix. Thus, if  $\text{rank}(F(w)) = k \leq d$ , then there exist matrices  $\Gamma_w \in \mathbb{R}^{d \times d}$  and  $\Lambda_w \in \mathbb{R}^{d \times d}$  such that  $F(w) = \Lambda_w^\top \Gamma_w \Lambda_w$ , where  $\Gamma_w = \text{diag}[\lambda_1, \lambda_2, \dots, \lambda_k, 0, 0, \dots, 0]$  and  $\Lambda_w^\top = [\psi_1, \psi_2, \dots, \psi_k, \psi_{k+1}, \psi_{k+2}, \dots, \psi_d]$  is an orthogonal matrices with  $\{\psi_1, \psi_2, \dots, \psi_k\}$  spans over the column space  $\text{Col}(F(w))$  and  $\{\psi_{k+1}, \psi_{k+2}, \dots, \psi_k\} \perp \text{Col}(F(w))$ . Without loss of generality, we assume that for all  $w$ , the linear matrix equation  $F(w)x = \nabla J(w)$  has at least one solution  $x_w^* \in \mathbb{R}^d$ . Then we have

$$\begin{aligned} \theta_w^* &= (F(w) + \lambda I)^{-1} \nabla J(w) \\ &= (\Lambda_w^\top \Gamma_w \Lambda_w + \lambda I)^{-1} \nabla J(w) \\ &= \Lambda_w^\top (\Gamma_w + \lambda I)^{-1} \Lambda_w \nabla J(w) \\ &= \Lambda_w^\top \text{diag} \left[ \frac{1}{\lambda_1 + \lambda}, \dots, \frac{1}{\lambda_k + \lambda}, \frac{1}{\lambda}, \dots, \frac{1}{\lambda} \right] \Lambda_w \nabla J(w) \\ &\stackrel{(i)}{=} \Lambda_w^\top \text{diag} \left[ \frac{1}{\lambda_1 + \lambda}, \dots, \frac{1}{\lambda_k + \lambda}, \frac{1}{\lambda}, \dots, \frac{1}{\lambda} \right] [\psi_1^\top \nabla J(w), \dots, \psi_k^\top \nabla J(w), 0, \dots, 0]^\top \\ &= \Lambda_w^\top \left[ \frac{1}{\lambda_1 + \lambda} \psi_1^\top \nabla J(w), \dots, \frac{1}{\lambda_k + \lambda} \psi_k^\top \nabla J(w), 0, \dots, 0 \right]^\top, \end{aligned}$$

where (i) follows from the fact that  $\nabla J(w) \in \text{Col}(F(w))$  and  $\{\psi_{k+1}, \psi_{k+2}, \dots, \psi_k\} \perp \text{Col}(F(w))$ . Similarly, we also have

$$\begin{aligned} \theta_w^\dagger &= F(w)^\dagger \nabla J(w) \\ &= (\Lambda_w^\top \Gamma_w \Lambda_w)^\dagger \nabla J(w) \\ &= \Lambda_w^\top (\Gamma_w)^\dagger \Lambda_w \nabla J(w) \\ &= \Lambda_w^\top \text{diag} \left[ \frac{1}{\lambda_1}, \dots, \frac{1}{\lambda_k}, 0, \dots, 0 \right] \Lambda_w \nabla J(w) \\ &= \Lambda_w^\top \text{diag} \left[ \frac{1}{\lambda_1}, \dots, \frac{1}{\lambda_k}, 0, \dots, 0 \right] [\psi_1^\top \nabla J(w), \dots, \psi_k^\top \nabla J(w), 0, \dots, 0]^\top \\ &= \Lambda_w^\top \left[ \frac{1}{\lambda_1} \psi_1^\top \nabla J(w), \dots, \frac{1}{\lambda_k} \psi_k^\top \nabla J(w), 0, \dots, 0 \right]^\top. \end{aligned}$$

Thus we have

$$\theta_w^* - \theta_w^\dagger = \Lambda_w^\top \left[ \left( \frac{1}{\lambda_1 + \lambda} - \frac{1}{\lambda_1} \right) \psi_1^\top \nabla J(w), \dots, \left( \frac{1}{\lambda_k + \lambda} - \frac{1}{\lambda_1} \right) \psi_k^\top \nabla J(w), 0, \dots, 0 \right]^\top$$



$$\begin{aligned}
&= -\lambda A_w^\top \left[ \frac{1}{(\lambda_1 + \lambda)\lambda_1} \psi_1^\top \nabla J(w), \dots, \frac{1}{(\lambda_k + \lambda)\lambda_k} \psi_k^\top \nabla J(w), 0, \dots, 0 \right]^\top \\
&= -\lambda A_w^\top \text{diag} \left[ \frac{1}{(\lambda_1 + \lambda)\lambda_1}, \dots, \frac{1}{(\lambda_k + \lambda)\lambda_k}, 0, \dots, 0 \right] A_w \nabla J(w).
\end{aligned}$$

We can further obtain

$$\|\theta_w^* - \theta_w^\dagger\|_2 \leq \frac{\lambda}{\lambda_{\min}^2} \|A_w\|_2^2 \|\nabla J(w)\|_2 \stackrel{(i)}{\leq} \frac{C_\psi r_{\max}}{\lambda_{\min}^2 (1-\gamma)} \lambda = C_r \lambda,$$

where in (i) we define  $\lambda_{\min} = \min_{w \in \mathbb{R}^d} \min_{1 \leq i \leq k_w} \lambda_{w,i}$ , with  $\lambda_{w,i}$  being the  $i$ -th element in  $\Gamma_w$  and  $k_w$  being the rank of the matrix  $F(w)$ .  $\square$

## F Proof of Theorem 2

In this section and next section, we assume  $C_\psi = 1$  without loss of generality. We restate Theorem 2 as follows to include the specifics of the parameters.

**Theorem 5** (Restatement of Theorem 2). *Consider the AC algorithm in Algorithm 1. Suppose Assumptions 1 and 2 hold, and let the stepsize  $\alpha = \frac{1}{4L_J}$ . We have*

$$\begin{aligned}
&\mathbb{E}[\|\nabla_w J(w_{\bar{T}})\|_2^2] \\
&\leq \frac{16L_J r_{\max}}{(1-\gamma)T} + 18 \frac{\sum_{t=0}^{T-1} \mathbb{E}[\|\theta_t - \theta_{w_t}^*\|_2^2]}{T} + \frac{72(r_{\max} + 2R_\theta)^2 [1 + (\kappa - 1)\rho]}{B(1-\rho)} + C_1 \zeta_{\text{approx}}^{\text{critic}},
\end{aligned}$$

where  $C_1$  is a positive constant. Furthermore, let  $B \geq \frac{216(r_{\max} + 2R_\theta)^2 [1 + (\kappa - 1)\rho]}{(1-\rho)\epsilon}$  and  $T \geq \frac{48L_J r_{\max}}{(1-\gamma)\epsilon}$ . Suppose the same setting of Theorem 1 holds (with  $M$  and  $T_c$  defined therein) so that  $\mathbb{E}[\|\theta_t - \theta_{w_t}^*\|_2^2] \leq \frac{\epsilon}{108}$  for all  $0 \leq t \leq T - 1$ . We have

$$\mathbb{E}[\|\nabla_w J(w_{\bar{T}})\|_2^2] \leq \epsilon + \mathcal{O}(\zeta_{\text{approx}}^{\text{critic}}),$$

with the total sample complexity given by  $(B + MT_c)T = \mathcal{O}((1-\gamma)^{-2} \epsilon^{-2} \log(1/\epsilon))$ .

*Proof.* For brevity, we define  $v_t(\theta) = \frac{1}{B} \sum_{i=0}^{B-1} \delta_\theta(s_{t,i}, a_{t,i}, s_{t,i+1}) \psi_{w_t}(s_{t,i}, a_{t,i})$ ,  $A_\theta(s, a) = \mathbb{E}_{\tilde{\mathcal{P}}}[\delta_\theta(s, a, s') | (s, a)]$ , and  $g(\theta, w) = \mathbb{E}_{\nu_w}[A_\theta(s, a) \psi_w(s, a)]$  for all  $w \in \mathbb{R}^{d_1}$ ,  $\theta \in \mathbb{R}^{d_2}$  and  $t \geq 0$ . Following from the  $L_J$ -Lipschitz condition indicated in Proposition 1, we have

$$\begin{aligned}
J(w_{t+1}) &\geq J(w_t) + \langle \nabla_w J(w_t), w_{t+1} - w_t \rangle - \frac{L_J}{2} \|w_{t+1} - w_t\|_2^2 \\
&= J(w_t) + \alpha \langle \nabla_w J(w_t), v_t(\theta_t) - \nabla_w J(w_t) + \nabla_w J(w_t) \rangle - \frac{L_J \alpha^2}{2} \|v_t(\theta_t)\|_2^2 \\
&= J(w_t) + \alpha \|\nabla_w J(w_t)\|_2^2 + \alpha \langle \nabla_w J(w_t), v_t - \nabla_w J(w_t) \rangle \\
&\quad - \frac{L_J \alpha^2}{2} \|v_t(\theta_t) - \nabla_w J(w_t) + \nabla_w J(w_t)\|_2^2 \\
&\stackrel{(i)}{\geq} J(w_t) + \left(\frac{1}{2}\alpha - L_J \alpha^2\right) \|\nabla_w J(w_t)\|_2^2 - \left(\frac{1}{2}\alpha + L_J \alpha^2\right) \|v_t(\theta_t) - \nabla_w J(w_t)\|_2^2,
\end{aligned} \tag{18}$$

where (i) follows because

$$\langle \nabla_w J(w_t), v_t(\theta_t) - \nabla_w J(w_t) \rangle \geq -\frac{1}{2} \|\nabla_w J(w_t)\|_2^2 - \frac{1}{2} \|v_t(\theta_t) - \nabla_w J(w_t)\|_2^2,$$

and

$$\|v_t(\theta_t) - \nabla_w J(w_t) + \nabla_w J(w_t)\|_2^2 \leq 2 \|v_t(\theta_t) - \nabla_w J(w_t)\|_2^2 + 2 \|\nabla_w J(w_t)\|_2^2.$$

Taking expectation on both sides of eq. (18) conditioned on  $\mathcal{F}_t$  and rearranging eq. (18) yield

$$\left(\frac{1}{2}\alpha - L_J \alpha^2\right) \mathbb{E}[\|\nabla_w J(w_t)\|_2^2 | \mathcal{F}_t]$$

$$\leq \mathbb{E}[J(w_{t+1})|\mathcal{F}_t] - J(w_t) + \left(\frac{1}{2}\alpha + L_J\alpha^2\right)\mathbb{E}[\|v_t(\theta_t) - \nabla_w J(w_t)\|_2^2 | \mathcal{F}_t]. \quad (19)$$

Then, we upper-bound the term  $\mathbb{E}[\|v_t(\theta_t) - \nabla_w J(w_t)\|_2^2 | \mathcal{F}_t]$  as follows. By definition, we have

$$\begin{aligned} & \|v_t(\theta_t) - \nabla_w J(w_t)\|_2^2 \\ &= \|v_t(\theta_t) - v_t(\theta_{w_t}^*) + v_t(\theta_{w_t}^*) - g(\theta_{w_t}^*, w_t) + g(\theta_{w_t}^*, w_t) - \nabla_w J(w_t)\|_2^2 \\ &\leq 3\|v_t(\theta_t) - v_t(\theta_{w_t}^*)\|_2^2 + 3\|v_t(\theta_{w_t}^*) - g(\theta_{w_t}^*, w_t)\|_2^2 + 3\|g(\theta_{w_t}^*, w_t) - \nabla_w J(w_t)\|_2^2, \end{aligned} \quad (20)$$

in which

$$\begin{aligned} & \|v_t(\theta_t) - v_t(\theta_{w_t}^*)\|_2^2 \\ &= \left\| \frac{1}{B} \sum_{i=0}^{B-1} \left[ \delta_{\theta_t}(s_{t,i}, a_{t,i}, s_{t,i+1}) - \delta_{\theta_{w_t}^*}(s_{t,i}, a_{t,i}, s_{t,i+1}) \right] \psi_{w_t}(s_{t,i}, a_{t,i}) \right\|_2^2 \\ &\leq \frac{1}{B} \sum_{i=0}^{B-1} \left\| \left[ \delta_{\theta_t}(s_{t,i}, a_{t,i}, s_{t,i+1}) - \delta_{\theta_{w_t}^*}(s_{t,i}, a_{t,i}, s_{t,i+1}) \right] \psi_{w_t}(s_{t,i}, a_{t,i}) \right\|_2^2 \\ &\leq \frac{1}{B} \sum_{i=0}^{B-1} \left\| \delta_{\theta_t}(s_{t,i}, a_{t,i}, s_{t,i+1}) - \delta_{\theta_{w_t}^*}(s_{t,i}, a_{t,i}, s_{t,i+1}) \right\|_2^2 \\ &= \frac{1}{B} \sum_{i=0}^{B-1} \left\| \gamma(V_{\theta_t}(s_{t,i+1}) - V_{\theta_{w_t}^*}(s_{t,i+1})) + (V_{\theta_{w_t}^*}(s_{t,i}) - V_{\theta_t}(s_{t,i})) \right\|_2^2 \\ &= \frac{1}{B} \sum_{i=0}^{B-1} \left\| (\gamma\phi(s_{t,i+1}) - \phi(s_{t,i}))^\top (\theta_t - \theta_{w_t}^*) \right\|_2^2 \leq 4\|\theta_t - \theta_{w_t}^*\|_2^2, \end{aligned} \quad (21)$$

and

$$\begin{aligned} & \|g(\theta_{w_t}^*, w_t) - \nabla_w J(w_t)\|_2^2 \\ &= \left\| \mathbb{E}_{\nu_{w_t}} [A_{\theta_{w_t}^*}(s, a)\psi_{w_t}(s, a)] - \mathbb{E}_{\nu_{w_t}} [A_{\pi_{w_t}}(s, a)\psi_{w_t}(s, a)] \right\|_2^2 \\ &= \left\| \mathbb{E}_{\nu_{w_t}} \left[ (A_{\theta_{w_t}^*}(s, a) - A_{\pi_{w_t}}(s, a)) \psi_{w_t}(s, a) \right] \right\|_2^2 \\ &\leq \mathbb{E}_{\nu_{w_t}} \left[ \left\| (A_{\theta_{w_t}^*}(s, a) - A_{\pi_{w_t}}(s, a)) \psi_{w_t}(s, a) \right\|_2^2 \right] \leq \mathbb{E}_{\nu_{w_t}} \left[ \left\| A_{\theta_{w_t}^*}(s, a) - A_{\pi_{w_t}}(s, a) \right\|_2^2 \right] \\ &= \mathbb{E}_{\nu_{w_t}} \left[ \left| \gamma \mathbb{E} [V_{\theta_{w_t}^*}(s') - V_{\pi_{w_t}}(s') | (s, a)] + V_{\pi_{w_t}}(s) - V_{\theta_{w_t}^*}(s) \right|^2 \right] \\ &\leq 2\mathbb{E}_{\nu_{w_t}} \left[ \left| \gamma \mathbb{E} [V_{\theta_{w_t}^*}(s') - V_{\pi_{w_t}}(s') | (s, a)] \right|^2 \right] + 2\mathbb{E} \left[ \left| V_{\pi_{w_t}}(s) - V_{\theta_{w_t}^*}(s) \right|^2 \right] \\ &\stackrel{(i)}{\leq} 4\zeta_{\text{approx}}^{\text{critic}}, \end{aligned} \quad (22)$$

where (i) follows from the definition  $\zeta_{\text{approx}}^{\text{critic}} = \max_{w \in \mathcal{W}} \mathbb{E}_{\nu_w} [|V_{\pi_w}(s) - V_{\theta_{\pi_w}^*}(s)|^2]$ . Substituting eq. (21) and eq. (22) into eq. (20) yields

$$\begin{aligned} & \mathbb{E}[\|v_t(\theta_t) - \nabla_w J(w_t)\|_2^2 | \mathcal{F}_t] \\ &\leq 3\mathbb{E} \left[ \|v_t(\theta_{w_t}^*) - g(\theta_{w_t}^*, w_t)\|_2^2 | \mathcal{F}_t \right] + 12\|\theta_t - \theta_{w_t}^*\|_2^2 + 12\zeta_{\text{approx}}^{\text{critic}}. \end{aligned} \quad (23)$$

To upper bound the first term on the right-hand-side of eq. (23), we proceed as follows.

$$\begin{aligned} & \mathbb{E} \left[ \|v_t(\theta_{w_t}^*) - g(\theta_{w_t}^*, w_t)\|_2^2 | \mathcal{F}_t \right] \\ &= \mathbb{E} \left[ \left\| \frac{1}{B} \sum_{i=0}^{B-1} \delta_{\theta_{w_t}^*}(s_{t,i}, a_{t,i}, s_{t,i+1}) \psi_{w_t}(s_{t,i}, a_{t,i}) - \mathbb{E}_{\nu_{w_t}} [A_{\theta_{w_t}^*}(s, a)\psi_{w_t}(s, a)] \right\|_2^2 \middle| \mathcal{F}_t \right] \end{aligned}$$

$$\begin{aligned}
&= \frac{1}{B^2} \sum_{i=0}^{B-1} \sum_{j=0}^{B-1} \mathbb{E} \left[ \left\langle \delta_{\theta_{w_t}^*}(s_{t,i}, a_{t,i}, s_{t,i+1}) \psi_{w_t}(s_{t,i}, a_{t,i}) - \mathbb{E}_{\nu_w} [A_{\theta_{w_t}^*}(s, a) \psi_{w_t}(s, a)], \right. \right. \\
&\quad \left. \left. \delta_{\theta_{w_t}^*}(s_{t,j}, a_{t,j}, s_{t,j+1}) \psi_{w_t}(s_{t,j}, a_{t,j}) - \mathbb{E}_{\nu_w} [A_{\theta_{w_t}^*}(s, a) \psi_{w_t}(s, a)] \right\rangle \middle| \mathcal{F}_t \right] \\
&\stackrel{(i)}{\leq} \frac{1}{B^2} \left[ 4B (r_{\max} + 2R\theta)^2 \right. \\
&\quad \left. + \sum_{i \neq j} \mathbb{E} \left[ \left\langle \delta_{\theta_{w_t}^*}(s_{t,i}, a_{t,i}, s_{t,i+1}) \psi_{w_t}(s_{t,i}, a_{t,i}) - \mathbb{E}_{\nu_w} [A_{\theta_{w_t}^*}(s, a) \psi_{w_t}(s, a)], \right. \right. \right. \\
&\quad \left. \left. \delta_{\theta_{w_t}^*}(s_{t,j}, a_{t,j}, s_{t,j+1}) \psi_{w_t}(s_{t,j}, a_{t,j}) - \mathbb{E}_{\nu_w} [A_{\theta_{w_t}^*}(s, a) \psi_{w_t}(s, a)] \right\rangle \middle| \mathcal{F}_t \right], \quad (24)
\end{aligned}$$

where (i) follows from the fact that  $|\delta_{\theta_{w_t}^*}(s_{t,j}, a_{t,j}, s_{t,j+1}) \psi_{w_t}(s_{t,j}, a_{t,j})| \leq r_{\max} + 2R\theta$  and  $|\mathbb{E}_{\nu_w} [A_{\theta_{w_t}^*}(s, a) \psi_{w_t}(s, a)]| \leq r_{\max} + 2R\theta$ . We next upper bound the following term for the case  $i > j$ .

$$\begin{aligned}
&\mathbb{E} \left[ \left\langle \delta_{\theta_{w_t}^*}(s_{t,i}, a_{t,i}, s_{t,i+1}) \psi_{w_t}(s_{t,i}, a_{t,i}) - \mathbb{E}_{\nu_w} [A_{\theta_{w_t}^*}(s, a) \psi_{w_t}(s, a)], \right. \right. \\
&\quad \left. \left. \delta_{\theta_{w_t}^*}(s_{t,j}, a_{t,j}, s_{t,j+1}) \psi_{w_t}(s_{t,j}, a_{t,j}) - \mathbb{E}_{\nu_w} [A_{\theta_{w_t}^*}(s, a) \psi_{w_t}(s, a)] \right\rangle \middle| \mathcal{F}_t \right] \\
&= \mathbb{E} \left[ \mathbb{E} \left[ \left\langle \delta_{\theta_{w_t}^*}(s_{t,i}, a_{t,i}, s_{t,i+1}) \psi_{w_t}(s_{t,i}, a_{t,i}) - \mathbb{E}_{\nu_w} [A_{\theta_{w_t}^*}(s, a) \psi_{w_t}(s, a)], \right. \right. \right. \\
&\quad \left. \left. \delta_{\theta_{w_t}^*}(s_{t,j}, a_{t,j}, s_{t,j+1}) \psi_{w_t}(s_{t,j}, a_{t,j}) - \mathbb{E}_{\nu_w} [A_{\theta_{w_t}^*}(s, a) \psi_{w_t}(s, a)] \right\rangle \middle| \mathcal{F}_{t,j} \right] \middle| \mathcal{F}_t \right] \\
&= \mathbb{E} \left[ \left\langle \mathbb{E} \left[ \delta_{\theta_{w_t}^*}(s_{t,i}, a_{t,i}, s_{t,i+1}) \psi_{w_t}(s_{t,i}, a_{t,i}) \middle| \mathcal{F}_{t,j} \right] - \mathbb{E}_{\nu_w} [A_{\theta_{w_t}^*}(s, a) \psi_{w_t}(s, a)], \right. \right. \\
&\quad \left. \left. \delta_{\theta_{w_t}^*}(s_{t,j}, a_{t,j}, s_{t,j+1}) \psi_{w_t}(s_{t,j}, a_{t,j}) - \mathbb{E}_{\nu_w} [A_{\theta_{w_t}^*}(s, a) \psi_{w_t}(s, a)] \right\rangle \middle| \mathcal{F}_t \right] \\
&= \mathbb{E} \left[ \left\langle \mathbb{E} \left[ A_{\theta_{w_t}^*}(s_{t,i}, a_{t,i}) \psi_{w_t}(s_{t,i}, a_{t,i}) \middle| \mathcal{F}_{t,j} \right] - \mathbb{E}_{\nu_w} [A_{\theta_{w_t}^*}(s, a) \psi_{w_t}(s, a)], \right. \right. \\
&\quad \left. \left. \delta_{\theta_{w_t}^*}(s_{t,j}, a_{t,j}, s_{t,j+1}) \psi_{w_t}(s_{t,j}, a_{t,j}) - \mathbb{E}_{\nu_w} [A_{\theta_{w_t}^*}(s, a) \psi_{w_t}(s, a)] \right\rangle \middle| \mathcal{F}_t \right] \\
&\leq \mathbb{E} \left[ \left\| \mathbb{E} \left[ A_{\theta_{w_t}^*}(s_{t,i}, a_{t,i}) \psi_{w_t}(s_{t,i}, a_{t,i}) \middle| \mathcal{F}_{t,j} \right] - \mathbb{E}_{\nu_w} [A_{\theta_{w_t}^*}(s, a) \psi_{w_t}(s, a)] \right\|_2 \right. \\
&\quad \left. \left\| \delta_{\theta_{w_t}^*}(s_{t,j}, a_{t,j}, s_{t,j+1}) \psi_{w_t}(s_{t,j}, a_{t,j}) - \mathbb{E}_{\nu_w} [A_{\theta_{w_t}^*}(s, a) \psi_{w_t}(s, a)] \right\|_2 \middle| \mathcal{F}_t \right] \\
&\leq 2(r_{\max} + 2R\theta) \mathbb{E} \left[ \left\| \mathbb{E} \left[ A_{\theta_{w_t}^*}(s_{t,i}, a_{t,i}) \psi_{w_t}(s_{t,i}, a_{t,i}) \middle| \mathcal{F}_{t,j} \right] - \mathbb{E}_{\nu_w} [A_{\theta_{w_t}^*}(s, a) \psi_{w_t}(s, a)] \right\|_2 \middle| \mathcal{F}_t \right] \\
&\stackrel{(i)}{\leq} 4(r_{\max} + 2R\theta)^2 \kappa \rho^{i-j},
\end{aligned}$$

where (i) follows from Assumption 2 and the fact that

$$\begin{aligned}
&\left\| \mathbb{E} \left[ A_{\theta_{w_t}^*}(s_{t,i}, a_{t,i}) \psi_{w_t}(s_{t,i}, a_{t,i}) \middle| \mathcal{F}_{t,j} \right] - \mathbb{E}_{\nu_w} [A_{\theta_{w_t}^*}(s, a) \psi_{w_t}(s, a)] \right\|_2 \\
&= \left\| \int_{x_{t,i}} A_{\theta_{w_t}^*}(x_{t,i}) \psi_{w_t}(x_{t,i}) P(dx_{t,i} | \mathcal{F}_{t,j}) - \int_{x_{t,i}} A_{\theta_{w_t}^*}(x_{t,i}) \psi_{w_t}(x_{t,i}) \nu_{\pi_{w_t}}(dx_{t,i}) \right\|_2 \\
&\leq \int_{x_i} \left\| A_{\theta_{w_t}^*}(x_{t,i}) \psi_{w_t}(x_{t,i}) \right\|_2 |P(dx_{t,i} | \mathcal{F}_{t,j}) - \nu_{\pi_{w_t}}(dx_{t,i})| \\
&\leq 2(r_{\max} + 2R\theta) \|P(\cdot | \mathcal{F}_{t,j}) - \nu_{\pi_{w_t}}(\cdot)\|_{TV} \leq 2(r_{\max} + 2R\theta) \kappa \rho^{i-j}, \quad (25)
\end{aligned}$$

where we denote  $x_{t,k} = (s_{t,k}, a_{t,k})$  for  $k \geq 0$  for convenience. Substituting eq. (25) into eq. (24) yields

$$\mathbb{E} \left[ \|v_t(\theta_{w_t}^*) - g(\theta_{w_t}^*, w_t)\|_2^2 \middle| \mathcal{F}_t \right] \leq \frac{1}{B^2} \left[ 4B (r_{\max} + 2R\theta)^2 + 4(r_{\max} + 2R\theta)^2 \kappa \sum_{i \neq j} \rho^{i-j} \right]$$

$$\begin{aligned}
&\leq \frac{1}{B^2} \left[ 4B (r_{\max} + 2R_\theta)^2 + \frac{8(r_{\max} + 2R_\theta)^2 \kappa \rho B}{1 - \rho} \right] \\
&\leq \frac{8(r_{\max} + 2R_\theta)^2 [1 + (\kappa - 1)\rho]}{B(1 - \rho)}. \tag{26}
\end{aligned}$$

Substituting eq. (26) into eq. (23) yields

$$\begin{aligned}
&\mathbb{E}[\|v_t(\theta_t) - \nabla_w J(w_t)\|_2^2 | \mathcal{F}_t] \\
&\leq \frac{24(r_{\max} + 2R_\theta)^2 [1 + (\kappa - 1)\rho]}{B(1 - \rho)} + 12 \|\theta_t - \theta_{w_t}^*\|_2^2 + 12\zeta_{\text{approx}}^{\text{critic}}. \tag{27}
\end{aligned}$$

Then, substituting eq. (27) into eq. (19) and taking expectation of  $\mathcal{F}_t$  on both sides yield

$$\begin{aligned}
&\left(\frac{1}{2}\alpha - L_J \alpha^2\right) \mathbb{E}[\|\nabla_w J(w_t)\|_2^2] \\
&\leq \mathbb{E}[J(w_{t+1})] - \mathbb{E}[J(w_t)] + 12\left(\frac{1}{2}\alpha + L_J \alpha^2\right) \mathbb{E}[\|\theta_t - \theta_{w_t}^*\|_2^2] + 12\left(\frac{1}{2}\alpha + L_J \alpha^2\right) \zeta_{\text{approx}}^{\text{critic}} \\
&\quad + 24\left(\frac{1}{2}\alpha + L_J \alpha^2\right) \frac{(r_{\max} + 2R_\theta)^2 [1 + (\kappa - 1)\rho]}{B(1 - \rho)}. \tag{28}
\end{aligned}$$

Letting  $\alpha = \frac{1}{4L_J}$  and dividing both sides of eq. (28) by  $1/(16L_J)$  yield

$$\begin{aligned}
\mathbb{E}[\|\nabla_w J(w_t)\|_2^2] &\leq 16L_J (\mathbb{E}[J(w_{t+1})] - \mathbb{E}[J(w_t)]) + 36\mathbb{E}[\|\theta_t - \theta_{w_t}^*\|_2^2] + 36\zeta_{\text{approx}}^{\text{critic}} \\
&\quad + \frac{72(r_{\max} + 2R_\theta)^2 [1 + (\kappa - 1)\rho]}{B(1 - \rho)}. \tag{29}
\end{aligned}$$

Taking the summation of eq. (29) over  $t = \{0, \dots, T - 1\}$  and dividing both sides by  $T$  yield

$$\begin{aligned}
\mathbb{E}[\|\nabla_w J(w_T)\|_2^2] &= \frac{1}{T} \sum_{t=0}^{T-1} \mathbb{E}[\|\nabla_w J(w_t)\|_2^2] \\
&\leq \frac{16L_J (\mathbb{E}[J(w_T)] - J(w_0))}{T} + 36 \frac{\sum_{t=0}^{T-1} \mathbb{E}[\|\theta_t - \theta_{w_t}^*\|_2^2]}{T} \\
&\quad + \frac{72(r_{\max} + 2R_\theta)^2 [1 + (\kappa - 1)\rho]}{B(1 - \rho)} + C_1 \zeta_{\text{approx}}^{\text{critic}} \\
&\leq \frac{16L_J r_{\max}}{(1 - \gamma)T} + 36 \frac{\sum_{t=0}^{T-1} \mathbb{E}[\|\theta_t - \theta_{w_t}^*\|_2^2]}{T} \\
&\quad + \frac{72(r_{\max} + 2R_\theta)^2 [1 + (\kappa - 1)\rho]}{B(1 - \rho)} + C_1 \zeta_{\text{approx}}^{\text{critic}}. \tag{30}
\end{aligned}$$

Letting  $B \geq \frac{216(r_{\max} + 2R_\theta)^2 [1 + (\kappa - 1)\rho]}{(1 - \rho)\epsilon}$ ,  $\mathbb{E}[\|\theta_t - \theta_{w_t}^*\|_2^2] \leq \frac{\epsilon}{108}$  for all  $0 \leq t \leq T - 1$ , and  $T \geq \frac{48L_J r_{\max}}{(1 - \gamma)\epsilon}$ , then we have

$$\frac{1}{T} \sum_{t=0}^{T-1} \mathbb{E}[\|\nabla_w J(w_i)\|_2^2] \leq \epsilon + \mathcal{O}(\zeta_{\text{approx}}^{\text{critic}}).$$

The total sample complexity is given by

$$(B + MT_c)T = \mathcal{O}\left[\left(\frac{1}{\epsilon} + \frac{1}{\epsilon} \log\left(\frac{1}{\epsilon}\right)\right) \frac{1}{(1 - \gamma)^2 \epsilon}\right] = \mathcal{O}\left(\frac{1}{(1 - \gamma)^2 \epsilon^2} \log\left(\frac{1}{\epsilon}\right)\right).$$

□

## G Proof of Theorem 3

We restate Theorem 3 as follows to include the specifics of the parameters.

**Theorem 6** (Restatement of Theorem 3). *Consider the NAC algorithm in Algorithm 1. Suppose Assumptions 1 and 2 hold, and let the stepsize  $\alpha = \frac{\lambda^2}{4L_J(1+\lambda)}$ . We have*

$$\begin{aligned}
J(\pi^*) - \mathbb{E}[J(\pi_{w_T})] &\leq \frac{4L_J(1+\lambda)(D(w_0) - \mathbb{E}[D(w_T)])}{T(1-\gamma)\lambda^2} + \frac{4L_\psi(1+\lambda)}{\lambda^2(1-\gamma)} \frac{\mathbb{E}[J(w_T)] - J(w_0)}{T} \\
&\quad + \frac{81L_\psi(1+\lambda)}{\lambda^2(1-\gamma)L_J} \frac{\sum_{t=0}^{T-1} \mathbb{E}[\|\theta_t - \theta_{w_t}^*\|_2^2]}{T} \\
&\quad + \frac{3L_\psi(1+\lambda)}{(1-\gamma)L_J} \left( \frac{8r_{\max}^2}{\lambda^4(1-\gamma)^2} + \frac{108(r_{\max} + 2R_\theta)^2}{\lambda^2} \right) \frac{1 + (\kappa - 1)\rho}{(1-\rho)B} \\
&\quad + \frac{162L_\psi(1+\lambda)}{\lambda^2(1-\gamma)L_J} \zeta_{\text{approx}}^{\text{critic}} + \frac{16\sqrt{\zeta_{\text{approx}}^{\text{critic}}}}{\lambda(1-\gamma)} + \frac{64L_\psi \zeta_{\text{approx}}^{\text{critic}}}{(1-\gamma)L_J(1+\lambda)} \\
&\quad + \sqrt{\frac{1}{(1-\gamma)^3} \left\| \frac{\nu_{\pi^*}}{\nu_{\pi_{w_0}}} \right\|_\infty} \sqrt{\zeta_{\text{approx}}^{\text{actor}}} + \frac{C_r \lambda}{1-\gamma}, \tag{31}
\end{aligned}$$

where  $\lambda$  is the regularizing coefficient for estimating the inverse of Fisher information matrix. Furthermore, let

$$\begin{aligned}
T &\geq \max \left\{ \frac{16L_J(1+\lambda)}{\epsilon(1-\gamma)\lambda^2}, \frac{16r_{\max}L_\psi(1+\lambda)}{\epsilon(1-\gamma)^2\lambda^2} \right\}, \\
B &\geq \max \left\{ \frac{24(r_{\max} + 2R_\theta)^2[1 + (\kappa - 1)\rho]}{(1-\rho)\zeta_{\text{approx}}^{\text{critic}}}, \frac{8r_{\max}^2[1 + (\kappa - 1)\rho]}{\lambda^2(1-\gamma)^2(1-\rho)\zeta_{\text{approx}}^{\text{critic}}}, \right. \\
&\quad \left. \frac{3L_\psi(1+\lambda)}{\epsilon(1-\gamma)L_J} \left( \frac{32r_{\max}^2}{\lambda^4(1-\gamma)^2} + \frac{432(r_{\max} + 2R_\theta)^2}{\lambda^2} \right) \frac{1 + (\kappa - 1)\rho}{(1-\rho)} \right\}, \\
\lambda &= \sqrt{\zeta_{\text{approx}}^{\text{critic}}}.
\end{aligned}$$

Suppose the same setting of Theorem 1 holds (with  $M$  and  $T_c$  defined therein) so that

$$\mathbb{E} \left[ \|\theta_t - \theta_{w_t}^*\|_2^2 \right] \leq \min \left\{ \frac{\zeta_{\text{approx}}^{\text{critic}}}{64}, \frac{\epsilon\lambda^2(1-\gamma)L_J}{324L_\psi(1+\lambda)} \right\}, \quad \text{for all } 0 \leq t \leq T-1.$$

We have

$$J(\pi^*) - \frac{1}{T} \sum_{t=0}^{T-1} \mathbb{E}[J(\pi_{w_t})] \leq \epsilon + \mathcal{O} \left( \frac{\sqrt{\zeta_{\text{approx}}^{\text{actor}}}}{(1-\gamma)^{1.5}} \right) + \mathcal{O} \left( \frac{\sqrt{\zeta_{\text{approx}}^{\text{critic}}}}{1-\gamma} \right),$$

with the total sample complexity given by  $(B + MT_c)T = \mathcal{O}((1-\gamma)^{-4}\epsilon^{-2} \log(1/\epsilon))$ .

*Proof.* We first show that NAC in Algorithm 1 converges to a neighbourhood of a first-order stationary point. Then we present the proof of Theorem 3/Theorem 6, in which the convergence of NAC is characterized in terms of the function value.

Recall the definition of  $v_t(\theta)$  in Appendix F, we define

$$u_t(\theta) = [F_t(w_t) + \lambda I]^{-1} \left[ \frac{1}{B} \sum_{i=0}^{B-1} \delta_\theta(s_{t,i}, a_{t,i}) \psi_{w_t}(s_{t,i}, a_{t,i}, s_{t,i+1}) \right] = [F_t(w_t) + \lambda I]^{-1} v_t(\theta).$$

Following from the  $L_J$ -Lipschitz condition indicated in Proposition 1, we have

$$\begin{aligned}
J(w_{t+1}) &\geq J(w_t) + \langle \nabla_w J(w_t), w_{t+1} - w_t \rangle - \frac{L_J}{2} \|w_{t+1} - w_t\|_2^2 \\
&= J(w_t) + \alpha \langle \nabla_w J(w_t), u_t(\theta_t) \rangle - \frac{L_J \alpha^2}{2} \|u_t(\theta_t)\|_2^2 \\
&= J(w_t) + \alpha \langle \nabla_w J(w_t), (F(w_t) + \lambda I)^{-1} \nabla_w J(w_t) \rangle \\
&\quad + \alpha \langle \nabla_w J(w_t), u_t(\theta_t) - (F(w_t) + \lambda I)^{-1} \nabla_w J(w_t) \rangle
\end{aligned}$$

$$\begin{aligned}
& - \frac{L_J \alpha^2}{2} \left\| u_t(\theta_t) - (F(w_t) + \lambda I)^{-1} \nabla_w J(w_t) + (F(w_t) + \lambda I)^{-1} \nabla_w J(w_t) \right\|_2^2 \\
& \stackrel{(i)}{\geq} J(w_t) + \frac{\alpha}{1 + \lambda} \left\| \nabla_w J(w_t) \right\|_2^2 + \alpha \langle \nabla_w J(w_t), u_t(\theta_t) - (F(w_t) + \lambda I)^{-1} \nabla_w J(w_t) \rangle \\
& \quad - L_J \alpha^2 \left\| u_t(\theta_t) - (F(w_t) + \lambda I)^{-1} \nabla_w J(w_t) \right\|_2^2 - L_J \alpha^2 \left\| (F(w_t) + \lambda I)^{-1} \nabla_w J(w_t) \right\|_2^2 \\
& \stackrel{(ii)}{\geq} J(w_t) + \frac{\alpha}{1 + \lambda} \left\| \nabla_w J(w_t) \right\|_2^2 \\
& \quad - \alpha \left( \frac{1}{2(1 + \lambda)} \left\| \nabla_w J(w_t) \right\|_2^2 + \frac{1 + \lambda}{2} \left\| u_t(\theta_t) - (F(w_t) + \lambda I)^{-1} \nabla_w J(w_t) \right\|_2^2 \right) \\
& \quad - L_J \alpha^2 \left\| u_t(\theta_t) - (F(w_t) + \lambda I)^{-1} \nabla_w J(w_t) \right\|_2^2 - \frac{L_J \alpha^2}{\lambda^2} \left\| \nabla_w J(w_t) \right\|_2^2 \\
& = J(w_t) + \left( \frac{\alpha}{2(1 + \lambda)} - \frac{L_J \alpha^2}{\lambda^2} \right) \left\| \nabla_w J(w_t) \right\|_2^2 \\
& \quad - \left( \frac{\alpha(1 + \lambda)}{2} + L_J \alpha^2 \right) \left\| u_t(\theta_t) - (F(w_t) + \lambda I)^{-1} \nabla_w J(w_t) \right\|_2^2, \tag{32}
\end{aligned}$$

where (i) follows because  $\langle \nabla_w J(w_t), (F(w_t) + \lambda I)^{-1} \nabla_w J(w_t) \rangle \geq \frac{1}{1 + \lambda} \left\| \nabla_w J(w_t) \right\|_2^2$ , and (ii) follows from the fact that  $\left\| (F(w_t) + \lambda I)^{-1} \nabla_w J(w_t) \right\|_2^2 \leq \frac{1}{\lambda^2} \left\| \nabla_w J(w_t) \right\|_2^2$  and Young's inequality. To bound the term  $\left\| u_t(\theta_t) - (F(w_t) + \lambda I)^{-1} \nabla_w J(w_t) \right\|_2^2$ , we proceed as follows:

$$\begin{aligned}
& \left\| u_t(\theta_t) - (F(w_t) + \lambda I)^{-1} \nabla_w J(w_t) \right\|_2^2 \\
& = \left\| u_t(\theta_t) - (F(w_t) + \lambda I)^{-1} v_t(\theta_t) + (F(w_t) + \lambda I)^{-1} v_t(\theta_t) - (F(w_t) + \lambda I)^{-1} \nabla_w J(w_t) \right\|_2^2 \\
& \leq 2 \left\| u_t(\theta_t) - (F(w_t) + \lambda I)^{-1} v_t(\theta_t) \right\|_2^2 + 2 \left\| (F(w_t) + \lambda I)^{-1} v_t(\theta_t) - (F(w_t) + \lambda I)^{-1} \nabla_w J(w_t) \right\|_2^2 \\
& = 2 \left\| [(F_t(w_t) + \lambda I)^{-1} - (F(w_t) + \lambda I)^{-1}] v_t(\theta_t) \right\|_2^2 + 2 \left\| (F(w_t) + \lambda I)^{-1} (v_t(\theta_t) - \nabla_w J(w_t)) \right\|_2^2 \\
& = 2 \left\| [(F_t(w_t) + \lambda I)^{-1} - (F(w_t) + \lambda I)^{-1}] (v_t(\theta_t) - \nabla_w J(w_t) + \nabla_w J(w_t)) \right\|_2^2 \\
& \quad + 2 \left\| (F(w_t) + \lambda I)^{-1} (v_t - \nabla_w J(w_t)) \right\|_2^2 \\
& \leq 4 \left\| [(F_t(w_t) + \lambda I)^{-1} - (F(w_t) + \lambda I)^{-1}] (v_t(\theta_t) - \nabla_w J(w_t)) \right\|_2^2 \\
& \quad + 2 \left\| (F(w_t) + \lambda I)^{-1} (v_t - \nabla_w J(w_t)) \right\|_2^2 \\
& \quad + 4 \left\| [(F_t(w_t) + \lambda I)^{-1} - (F(w_t) + \lambda I)^{-1}] \nabla_w J(w_t) \right\|_2^2 \\
& \leq \left[ 4 \left\| (F_t(w_t) + \lambda I)^{-1} - (F(w_t) + \lambda I)^{-1} \right\|_2^2 + 2 \left\| (F(w_t) + \lambda I)^{-1} \right\|_2^2 \right] \left\| v_t(\theta_t) - \nabla_w J(w_t) \right\|_2^2 \\
& \quad + 4 \left\| (F_t(w_t) + \lambda I)^{-1} - (F(w_t) + \lambda I)^{-1} \right\|_2^2 \left\| \nabla_w J(w_t) \right\|_2^2 \\
& \leq \left[ 8 \left\| (F_t(w_t) + \lambda I)^{-1} \right\|_2^2 + 10 \left\| (F(w_t) + \lambda I)^{-1} \right\|_2^2 \right] \left\| v_t(\theta_t) - \nabla_w J(w_t) \right\|_2^2 \\
& \quad + 4 \left\| (F_t(w_t) + \lambda I)^{-1} - (F(w_t) + \lambda I)^{-1} \right\|_2^2 \left\| \nabla_w J(w_t) \right\|_2^2 \\
& \leq \frac{18}{\lambda^2} \left\| v_t(\theta_t) - \nabla_w J(w_t) \right\|_2^2 + 4 \left\| (F_t(w_t) + \lambda I)^{-1} - (F(w_t) + \lambda I)^{-1} \right\|_2^2 \left\| \nabla_w J(w_t) \right\|_2^2 \\
& = \frac{18}{\lambda^2} \left\| v_t(\theta_t) - \nabla_w J(w_t) \right\|_2^2 + 4 \left\| (F_t(w_t) + \lambda I)^{-1} (F(w_t) - F_t(w_t)) (F(w_t) + \lambda I)^{-1} \right\|_2^2 \left\| \nabla_w J(w_t) \right\|_2^2 \\
& \leq \frac{18}{\lambda^2} \left\| v_t(\theta_t) - \nabla_w J(w_t) \right\|_2^2 + 4 \left\| (F_t(w_t) + \lambda I)^{-1} \right\|_2^2 \left\| F(w_t) - F_t(w_t) \right\|_2^2 \left\| (F(w_t) + \lambda I)^{-1} \right\|_2^2 \left\| \nabla_w J(w_t) \right\|_2^2 \\
& \leq \frac{18}{\lambda^2} \left\| v_t(\theta_t) - \nabla_w J(w_t) \right\|_2^2 + \frac{4r_{\max}^2}{\lambda^4(1 - \gamma)^2} \left\| F(w_t) - F_t(w_t) \right\|_2^2. \tag{33}
\end{aligned}$$

Substituting eq. (33) into eq. (32), rearranging the terms and taking expectation on both sides conditioned over  $\mathcal{F}_t$  yield

$$\left( \frac{\alpha}{2(1 + \lambda)} - \frac{L_J \alpha^2}{\lambda^2} \right) \mathbb{E}[\left\| \nabla_w J(w_t) \right\|_2^2 | \mathcal{F}_t]$$

$$\begin{aligned}
&\leq \mathbb{E}[J(w_{t+1})|\mathcal{F}_t] - J(w_t) + \left(\frac{\alpha(1+\lambda)}{2} + L_J\alpha^2\right) \frac{18}{\lambda^2} \mathbb{E}[\|v_t(\theta_t) - \nabla_w J(w_t)\|_2^2 | \mathcal{F}_t] \\
&\quad + \left(\frac{\alpha(1+\lambda)}{2} + L_J\alpha^2\right) \frac{4r_{\max}^2}{\lambda^4(1-\gamma)^2} \mathbb{E}[\|F(w_t) - F_t(w_t)\|_2^2 | \mathcal{F}_t] \\
&\stackrel{(i)}{\leq} \mathbb{E}[J(w_{t+1})|\mathcal{F}_t] - J(w_t) + \left(\frac{\alpha(1+\lambda)}{2} + L_J\alpha^2\right) \frac{4r_{\max}^2}{\lambda^4(1-\gamma)^2} \frac{8[1+(\kappa-1)\rho]}{(1-\rho)B} \\
&\quad + \frac{18}{\lambda^2} \left(\frac{\alpha(1+\lambda)}{2} + L_J\alpha^2\right) \left(\frac{24(r_{\max} + 2R_\theta)^2[1+(\kappa-1)\rho]}{(1-\rho)B} + 6\|\theta_t - \theta_{w_t}^*\|_2^2 + 12\zeta_{\text{approx}}^{\text{critic}}\right),
\end{aligned}$$

where (i) follows from eq. (27) and the fact that

$$\mathbb{E}[\|F(w_t) - F_t(w_t)\|_2^2 | \mathcal{F}_t] \leq \frac{8[1+(\kappa-1)\rho]}{(1-\rho)B} \quad (\text{implied by Lemma 2}). \quad (34)$$

Letting  $\alpha = \frac{\lambda^2}{4L_J(1+\lambda)}$ , we obtain

$$\begin{aligned}
&\frac{\alpha}{4(1+\lambda)} \mathbb{E}[\|\nabla_w J(w_t)\|_2^2 | \mathcal{F}_t] \\
&\leq \mathbb{E}[J(w_{t+1})|\mathcal{F}_t] - J(w_t) + \left(\frac{\alpha(1+\lambda)}{2} + L_J\alpha^2\right) \left(\frac{32r_{\max}^2}{\lambda^4(1-\gamma)^2} + \frac{432(r_{\max} + 2R_\theta)^2}{\lambda^2}\right) \frac{1+(\kappa-1)\rho}{(1-\rho)B} \\
&\quad + \frac{108}{\lambda^2} \left(\frac{\alpha(1+\lambda)}{2} + L_J\alpha^2\right) \|\theta_t - \theta_{w_t}^*\|_2^2 + \frac{216}{\lambda^2} \left(\frac{\alpha(1+\lambda)}{2} + L_J\alpha^2\right) \zeta_{\text{approx}}^{\text{critic}}. \quad (35)
\end{aligned}$$

Taking expectation over  $\mathcal{F}_t$  on both sides of eq. (35) and then taking the summation over  $t = \{0, \dots, T-1\}$  yield

$$\begin{aligned}
&\frac{\alpha}{4(1+\lambda)} \sum_{t=0}^{T-1} \mathbb{E}[\|\nabla_w J(w_t)\|_2^2] \\
&\leq \mathbb{E}[J(w_T)] - J(w_0) + T \left(\frac{\alpha(1+\lambda)}{2} + L_J\alpha^2\right) \left(\frac{32r_{\max}^2}{\lambda^4(1-\gamma)^2} + \frac{432(r_{\max} + 2R_\theta)^2}{\lambda^2}\right) \frac{1+(\kappa-1)\rho}{(1-\rho)B} \\
&\quad + \frac{108}{\lambda^2} \left(\frac{\alpha(1+\lambda)}{2} + L_J\alpha^2\right) \sum_{t=0}^{T-1} \mathbb{E}[\|\theta_t - \theta_{w_t}^*\|_2^2] + \frac{216T}{\lambda^2} \left(\frac{\alpha(1+\lambda)}{2} + L_J\alpha^2\right) \zeta_{\text{approx}}^{\text{critic}}. \quad (36)
\end{aligned}$$

Dividing both sides of eq. (36) by  $\frac{\alpha T}{4(1+\lambda)}$  yields

$$\begin{aligned}
&\frac{1}{T} \sum_{t=0}^{T-1} \mathbb{E}[\|\nabla_w J(w_t)\|_2^2] \\
&\leq \frac{16L_J(1+\lambda)^2}{\lambda^2} \frac{\mathbb{E}[J(w_T)] - J(w_0)}{T} + \frac{108}{\lambda^2} [2(1+\lambda)^2 + \lambda^2] \frac{\sum_{t=0}^{T-1} \mathbb{E}[\|\theta_t - \theta_{w_t}^*\|_2^2]}{T} \\
&\quad + [2(1+\lambda)^2 + \lambda^2] \left(\frac{32r_{\max}^2}{\lambda^4(1-\gamma)^2} + \frac{432(r_{\max} + 2R_\theta)^2}{\lambda^2}\right) \frac{1+(\kappa-1)\rho}{(1-\rho)B} \\
&\quad + \frac{216}{\lambda^2} [2(1+\lambda)^2 + \lambda^2] \zeta_{\text{approx}}^{\text{critic}}. \quad (37)
\end{aligned}$$

Then, given the above convergence result on the gradient norm, we proceed to prove the convergence of NAC in terms of the function value. Denote  $D(w) = D_{KL}(\pi^*(\cdot|s), \pi_w(\cdot|s)) = \mathbb{E}_{\nu_{\pi^*}} \left[ \log \frac{\pi^*(a|s)}{\pi_w(a|s)} \right]$ ,  $u_{w_t}^\lambda = (F(w_t) + \lambda I)^{-1} \nabla_w J(w_t)$  and  $u_{w_t}^\dagger = F(w_t)^\dagger \nabla_w J(w_t)$ . We proceed as follows:

$$\begin{aligned}
&D(w_t) - D(w_{t+1}) \\
&= \mathbb{E}_{\nu_{\pi^*}} \left[ \log(\pi_{w_{t+1}}(a|s)) - \log(\pi_{w_t}(a|s)) \right]
\end{aligned}$$

$$\begin{aligned}
&\stackrel{(i)}{\geq} \mathbb{E}_{\nu_{\pi^*}} \left[ \nabla_w \log(\pi_{w_t}(a|s)) \right]^\top (w_{t+1} - w_t) - \frac{L_\psi}{2} \|w_{t+1} - w_t\|_2^2 \\
&= \mathbb{E}_{\nu_{\pi^*}} \left[ \psi_{w_t}(s, a) \right]^\top (w_{t+1} - w_t) - \frac{L_\psi}{2} \|w_{t+1} - w_t\|_2^2 \\
&= \alpha \mathbb{E}_{\nu_{\pi^*}} \left[ \psi_{w_t}(s, a) \right]^\top u_t(\theta_t) - \frac{L_\psi}{2} \alpha^2 \|u_t(\theta_t)\|_2^2 \\
&= \alpha \mathbb{E}_{\nu_{\pi^*}} \left[ \psi_{w_t}(s, a) \right]^\top u_{w_t}^\lambda + \alpha \mathbb{E}_{\nu_{\pi^*}} \left[ \psi_{w_t}(s, a) \right]^\top (u_t(\theta_t) - u_{w_t}^\lambda) - \frac{L_\psi}{2} \alpha^2 \|u_t(\theta_t)\|_2^2 \\
&= \alpha \mathbb{E}_{\nu_{\pi^*}} \left[ \psi_{w_t}(s, a) \right]^\top u_{w_t}^\dagger + \alpha \mathbb{E}_{\nu_{\pi^*}} \left[ \psi_{w_t}(s, a) \right]^\top (u_{w_t}^\lambda - u_{w_t}^\dagger) + \alpha \mathbb{E}_{\nu_{\pi^*}} \left[ \psi_{w_t}(s, a) \right]^\top (u_t(\theta_t) - u_{w_t}^\lambda) \\
&\quad - \frac{L_\psi}{2} \alpha^2 \|u_t(\theta_t)\|_2^2 \\
&= \alpha \mathbb{E}_{\nu_{\pi^*}} \left[ A_{\pi_{w_t}}(s, a) \right] + \alpha \mathbb{E}_{\nu_{\pi^*}} \left[ \psi_{w_t}(s, a) \right]^\top (u_{w_t}^\lambda - u_{w_t}^\dagger) + \alpha \mathbb{E}_{\nu_{\pi^*}} \left[ \psi_{w_t}(s, a) \right]^\top (u_t(\theta_t) - u_{w_t}^\lambda) \\
&\quad + \alpha \mathbb{E}_{\nu_{\pi^*}} \left[ \psi_{w_t}(s, a)^\top u_{w_t}^\dagger - A_{\pi_{w_t}}(s, a) \right] - \frac{L_\psi}{2} \alpha^2 \|u_t(\theta_t)\|_2^2 \\
&\stackrel{(ii)}{=} (1 - \gamma) \alpha \left( J(\pi^*) - J(\pi_{w_t}) \right) + \alpha \mathbb{E}_{\nu_{\pi^*}} \left[ \psi_{w_t}(s, a) \right]^\top (u_{w_t}^\lambda - u_{w_t}^\dagger) + \alpha \mathbb{E}_{\nu_{\pi^*}} \left[ \psi_{w_t}(s, a) \right]^\top (u_t(\theta_t) - u_{w_t}^\lambda) \\
&\quad + \alpha \mathbb{E}_{\nu_{\pi^*}} \left[ \psi_{w_t}(s, a)^\top u_{w_t}^\dagger - A_{\pi_{w_t}}(s, a) \right] - \frac{L_\psi}{2} \alpha^2 \|u_t(\theta_t)\|_2^2 \\
&\geq (1 - \gamma) \alpha \left( J(\pi^*) - J(\pi_{w_t}) \right) + \alpha \mathbb{E}_{\nu_{\pi^*}} \left[ \psi_{w_t}(s, a) \right]^\top (u_{w_t}^\lambda - u_{w_t}^\dagger) + \alpha \mathbb{E}_{\nu_{\pi^*}} \left[ \psi_{w_t}(s, a) \right]^\top (u_t(\theta_t) - u_{w_t}^\lambda) \\
&\quad - \alpha \sqrt{\mathbb{E}_{\nu_{\pi^*}} \left[ \psi_{w_t}(s, a)^\top u_{w_t}^\dagger - A_{\pi_{w_t}}(s, a) \right]^2} - \frac{L_\psi}{2} \alpha^2 \|u_t(\theta_t)\|_2^2 \\
&\stackrel{(iii)}{\geq} (1 - \gamma) \alpha \left( J(\pi^*) - J(\pi_{w_t}) \right) + \alpha \mathbb{E}_{\nu_{\pi^*}} \left[ \psi_{w_t}(s, a) \right]^\top (u_{w_t}^\lambda - u_{w_t}^\dagger) + \alpha \mathbb{E}_{\nu_{\pi^*}} \left[ \psi_{w_t}(s, a) \right]^\top (u_t(\theta_t) - u_{w_t}^\lambda) \\
&\quad - \sqrt{\left\| \frac{\nu_{\pi^*}}{\nu_{\pi_{w_t}}} \right\|_\infty} \alpha \sqrt{\mathbb{E}_{\nu_{\pi_{w_t}}} \left[ \psi_{w_t}(s, a)^\top u_{w_t}^\dagger - A_{\pi_{w_t}}(s, a) \right]^2} - \frac{L_\psi}{2} \alpha^2 \|u_t(\theta_t)\|_2^2 \\
&\stackrel{(iv)}{\geq} (1 - \gamma) \alpha \left( J(\pi^*) - J(\pi_{w_t}) \right) + \alpha \mathbb{E}_{\nu_{\pi^*}} \left[ \psi_{w_t}(s, a) \right]^\top (u_{w_t}^\lambda - u_{w_t}^\dagger) + \alpha \mathbb{E}_{\nu_{\pi^*}} \left[ \psi_{w_t}(s, a) \right]^\top (u_t(\theta_t) - u_{w_t}^\lambda) \\
&\quad - \sqrt{\frac{1}{1 - \gamma} \left\| \frac{\nu_{\pi^*}}{\nu_{\pi_{w_0}}} \right\|_\infty} \alpha \sqrt{\mathbb{E}_{\nu_{\pi_{w_t}}} \left[ \psi_{w_t}(s, a)^\top u_{w_t}^\dagger - A_{\pi_{w_t}}(s, a) \right]^2} - \frac{L_\psi}{2} \alpha^2 \|u_t(\theta_t)\|_2^2 \\
&\stackrel{(v)}{\geq} (1 - \gamma) \alpha \left( J(\pi^*) - J(\pi_{w_t}) \right) - \alpha C_r \lambda - \alpha \|u_t(\theta_t) - u_{w_t}^\lambda\|_2 \\
&\quad - \alpha \sqrt{\frac{1}{1 - \gamma} \left\| \frac{\nu_{\pi^*}}{\nu_{\pi_{w_0}}} \right\|_\infty} \sqrt{\mathbb{E}_{\nu_{\pi_{w_t}}} \left[ \psi_{w_t}(s, a)^\top u_{w_t}^\dagger - A_{\pi_{w_t}}(s, a) \right]^2} - \frac{L_\psi}{2} \alpha^2 \|u_t(\theta_t)\|_2^2, \tag{38}
\end{aligned}$$

where (i) follows from the  $L_\psi$ -Lipschitz condition indicated in Lemma 5, (ii) follows because

$$\mathbb{E}_{\nu_{\pi^*}} [A_{\pi_{w_t}}(s, a)] = (1 - \gamma) \left( J(\pi^*) - J(\pi_{w_t}) \right),$$

in Lemma 3.2 of [1], (iii) follows from the fact that

$$\left\| \frac{\nu_{\pi^*}}{\nu_{\pi_{w_t}}} \right\|_\infty \mathbb{E}_{\nu_{\pi_{w_t}}} \left[ \psi_{w_t}(s, a)^\top u_{w_t}^\dagger - A_{\pi_{w_t}}(s, a) \right]^2 \geq \mathbb{E}_{\nu_{\pi^*}} \left[ \psi_{w_t}(s, a)^\top u_{w_t}^\dagger - A_{\pi_{w_t}}(s, a) \right]^2,$$

(iv) follows because  $\nu_{\pi_{w_t}} \geq (1 - \gamma) \nu_{\pi_{w_0}}$  in [1, 17], and (v) follows from Lemma 6. Recalling the definition  $\zeta_{\text{approx}}^{\text{actor}} = \max_{w \in \mathcal{W}} \min_{p \in \mathbb{R}^{d_2}} \mathbb{E}_{\nu_{\pi_w}} \left[ \psi_w(s, a)^\top p - A_{\pi_w}(s, a) \right]^2$ , we have

$$\begin{aligned}
&D(w_t) - D(w_{t+1}) \\
&\geq (1 - \gamma) \alpha \left( J(\pi^*) - J(\pi_{w_t}) \right) - \alpha C_r \lambda - \alpha \|u_t(\theta_t) - u_{w_t}^\lambda\|_2
\end{aligned}$$



$$\begin{aligned}
& -\alpha \sqrt{\frac{1}{1-\gamma} \left\| \frac{\nu_{\pi^*}}{\nu_{\pi_{w_0}}} \right\|_{\infty}} \sqrt{\zeta_{\text{approx}}^{\text{actor}}} - \frac{L_{\psi}}{2} \alpha^2 \|u_t(\theta_t)\|_2^2 \\
& \geq (1-\gamma)\alpha \left( J(\pi^*) - J(\pi_{w_t}) \right) - \alpha C_r \lambda - \alpha \|u_t(\theta_t) - u_{w_t}^{\lambda}\|_2 \\
& -\alpha \sqrt{\frac{1}{1-\gamma} \left\| \frac{\nu_{\pi^*}}{\nu_{\pi_{w_0}}} \right\|_{\infty}} \sqrt{\zeta_{\text{approx}}^{\text{actor}}} - L_{\psi} \alpha^2 \|u_t(\theta_t) - u_{w_t}^{\lambda}\|_2^2 - L_{\psi} \alpha^2 \|u_{w_t}^{\lambda}\|_2^2 \\
& \geq (1-\gamma)\alpha \left( J(\pi^*) - J(\pi_{w_t}) \right) - \alpha C_r \lambda - \alpha \|u_t(\theta_t) - u_{w_t}^{\lambda}\|_2 \\
& -\alpha \sqrt{\frac{1}{1-\gamma} \left\| \frac{\nu_{\pi^*}}{\nu_{\pi_{w_0}}} \right\|_{\infty}} \sqrt{\zeta_{\text{approx}}^{\text{actor}}} - L_{\psi} \alpha^2 \|u_t(\theta_t) - u_{w_t}^{\lambda}\|_2^2 - \frac{L_{\psi} \alpha^2}{\lambda^2} \|\nabla_w J(w_t)\|_2^2.
\end{aligned} \tag{39}$$

Rearranging eq. (39), dividing both sides by  $(1-\gamma)\alpha$ , and taking expectation on both sides yield

$$\begin{aligned}
& J(\pi^*) - \mathbb{E}[J(\pi_{w_t})] \\
& \leq \frac{\mathbb{E}[D(w_t)] - \mathbb{E}[D(w_{t+1})]}{(1-\gamma)\alpha} + \frac{\mathbb{E}[\|u_t(\theta_t) - u_{w_t}^{\lambda}\|_2]}{1-\gamma} + \sqrt{\frac{1}{(1-\gamma)^3} \left\| \frac{\nu_{\pi^*}}{\nu_{\pi_{w_0}}} \right\|_{\infty}} \sqrt{\zeta_{\text{approx}}^{\text{actor}}} \\
& + \frac{L_{\psi} \alpha \mathbb{E}[\|u_t(\theta_t) - u_{w_t}^{\lambda}\|_2^2]}{1-\gamma} + \frac{L_{\psi} \alpha}{(1-\gamma)\lambda^2} \mathbb{E}[\|\nabla_w J(w_t)\|_2^2] + \frac{C_r \lambda}{1-\gamma} \\
& \leq \frac{\mathbb{E}[D(w_t)] - \mathbb{E}[D(w_{t+1})]}{(1-\gamma)\alpha} + \frac{\sqrt{\mathbb{E}[\|u_t(\theta_t) - u_{w_t}^{\lambda}\|_2^2]}}{1-\gamma} + \frac{L_{\psi} \alpha \mathbb{E}[\|u_t(\theta_t) - u_{w_t}^{\lambda}\|_2^2]}{1-\gamma} \\
& + \frac{L_{\psi} \alpha}{(1-\gamma)\lambda^2} \mathbb{E}[\|\nabla_w J(w_t)\|_2^2] + \sqrt{\frac{1}{(1-\gamma)^3} \left\| \frac{\nu_{\pi^*}}{\nu_{\pi_{w_0}}} \right\|_{\infty}} \sqrt{\zeta_{\text{approx}}^{\text{actor}}} + \frac{C_r \lambda}{1-\gamma}.
\end{aligned} \tag{40}$$

Recalling eq. (33), we have

$$\begin{aligned}
& \mathbb{E}[\|u_t(\theta_t) - u_{w_t}^{\lambda}\|_2^2] = \mathbb{E}[\|u_t(\theta_t) - (F(w_t) + \lambda I)^{-1} \nabla_w J(w_t)\|_2^2] \\
& \leq \frac{18}{\lambda^2} \mathbb{E}[\|v_t(\theta_t) - \nabla_w J(w_t)\|_2^2] + \frac{4r_{\max}^2}{\lambda^4(1-\gamma)^2} \mathbb{E}[\|F(w_t) - F_t(w_t)\|_2^2] \\
& \stackrel{(i)}{\leq} \frac{18}{\lambda^2} \left[ \frac{24(r_{\max} + 2R_{\theta})^2 [1 + (\kappa - 1)\rho]}{B(1-\rho)} + 6\mathbb{E}[\|\theta_t - \theta_{w_t}^*\|_2^2] + 12\zeta_{\text{approx}}^{\text{critic}} \right] \\
& + \frac{4r_{\max}^2}{\lambda^4(1-\gamma)^2} \frac{8[1 + (\kappa - 1)\rho]}{(1-\rho)B},
\end{aligned}$$

where (i) follows from eq. (27) and eq. (34). Letting  $\mathbb{E}[\|\theta_t - \theta_{w_t}^*\|_2^2] \leq \frac{\zeta_{\text{approx}}^{\text{critic}}}{64}$  and

$$B \geq \max \left\{ \frac{24(r_{\max} + 2R_{\theta})^2 [1 + (\kappa - 1)\rho]}{(1-\rho)\zeta_{\text{approx}}^{\text{critic}}}, \frac{8r_{\max}^2 [1 + (\kappa - 1)\rho]}{\lambda^2(1-\gamma)^2(1-\rho)\zeta_{\text{approx}}^{\text{critic}}} \right\},$$

we have

$$\mathbb{E}[\|u_t(\theta_t) - u_{w_t}^{\lambda}\|_2^2] \leq \frac{256}{\lambda^2} \zeta_{\text{approx}}^{\text{critic}}. \tag{41}$$

Note that  $\zeta_{\text{approx}}^{\text{critic}}$  is not small in general. Without loss of generality, here we assume  $\zeta_{\text{approx}}^{\text{critic}} = \Theta(1)$ . Substituting eq. (41) into eq. (40) yields

$$\begin{aligned}
& J(\pi^*) - \mathbb{E}[J(\pi_{w_t})] \\
& \leq \frac{\mathbb{E}[D(w_t)] - \mathbb{E}[D(w_{t+1})]}{(1-\gamma)\alpha} + \frac{16\sqrt{\zeta_{\text{approx}}^{\text{critic}}}}{\lambda(1-\gamma)} + \frac{256L_{\psi}\alpha\zeta_{\text{approx}}^{\text{critic}}}{\lambda^2(1-\gamma)} + \frac{L_{\psi}\alpha}{(1-\gamma)\lambda^2} \mathbb{E}[\|\nabla_w J(w_t)\|_2^2]
\end{aligned}$$

$$+ \sqrt{\frac{1}{(1-\gamma)^3} \left\| \frac{\nu_{\pi^*}}{\nu_{\pi_{w_0}}} \right\|_{\infty}} \sqrt{\zeta_{\text{approx}}^{\text{actor}}} + \frac{C_r \lambda}{1-\gamma}. \quad (42)$$

Substituting the value of  $\alpha$  into eq. (42), taking summation of eq. (42) over  $t = \{0, \dots, T-1\}$ , and dividing both sides by  $T$  yield

$$\begin{aligned} & J(\pi^*) - \frac{1}{T} \sum_{t=0}^{T-1} \mathbb{E}[J(\pi_{w_t})] \\ & \leq \frac{4L_J(1+\lambda)(D(w_0) - \mathbb{E}[D(w_T)])}{T(1-\gamma)\lambda^2} + \frac{L_{\psi}}{4(1-\gamma)L_J(C_{\psi}^2 + \lambda)} \frac{\sum_{t=0}^{T-1} \mathbb{E}[\|\nabla_w J(w_t)\|_2^2]}{T} \\ & \quad + \frac{16\sqrt{\zeta_{\text{approx}}^{\text{critic}}}}{\lambda(1-\gamma)} + \frac{64L_{\psi}\zeta_{\text{approx}}^{\text{critic}}}{(1-\gamma)L_J(1+\lambda)} + \sqrt{\frac{1}{(1-\gamma)^3} \left\| \frac{\nu_{\pi^*}}{\nu_{\pi_{w_0}}} \right\|_{\infty}} \sqrt{\zeta_{\text{approx}}^{\text{actor}}} + \frac{C_r \lambda}{1-\gamma} \\ & \stackrel{(i)}{\leq} \frac{4L_J(1+\lambda)(D(w_0) - \mathbb{E}[D(w_T)])}{T(1-\gamma)\lambda^2} + \frac{4L_{\psi}(1+\lambda)}{\lambda^2(1-\gamma)} \frac{\mathbb{E}[J(w_T)] - J(w_0)}{T} \\ & \quad + \frac{81L_{\psi}(1+\lambda)}{\lambda^2(1-\gamma)L_J} \frac{\sum_{t=0}^{T-1} \mathbb{E}[\|\theta_t - \theta_{w_t}^*\|_2^2]}{T} \\ & \quad + \frac{3L_{\psi}(1+\lambda)}{(1-\gamma)L_J} \left( \frac{8r_{\max}^2}{\lambda^4(1-\gamma)^2} + \frac{108(r_{\max} + 2R_{\theta})^2}{\lambda^2} \right) \frac{1 + (\kappa - 1)\rho}{(1-\rho)B} \\ & \quad + \frac{162L_{\psi}(1+\lambda)}{\lambda^2(1-\gamma)L_J} \zeta_{\text{approx}}^{\text{critic}} + \frac{16\sqrt{\zeta_{\text{approx}}^{\text{critic}}}}{\lambda(1-\gamma)} + \frac{64L_{\psi}\zeta_{\text{approx}}^{\text{critic}}}{(1-\gamma)L_J(1+\lambda)} \\ & \quad + \sqrt{\frac{1}{(1-\gamma)^3} \left\| \frac{\nu_{\pi^*}}{\nu_{\pi_{w_0}}} \right\|_{\infty}} \sqrt{\zeta_{\text{approx}}^{\text{actor}}} + \frac{C_r \lambda}{1-\gamma}, \end{aligned}$$

where (i) follows from eq. (37). Furthermore, letting

$$\begin{aligned} T & \geq \max \left\{ \frac{16L_J(1+\lambda)}{\epsilon(1-\gamma)\lambda^2}, \frac{16r_{\max}L_{\psi}(1+\lambda)}{\epsilon(1-\gamma)^2\lambda^2} \right\}, \\ B & \geq \frac{3L_{\psi}(1+\lambda)}{\epsilon(1-\gamma)L_J} \left( \frac{32r_{\max}^2}{\lambda^4(1-\gamma)^2} + \frac{432(r_{\max} + 2R_{\theta})^2}{\lambda^2} \right) \frac{1 + (\kappa - 1)\rho}{(1-\rho)}, \\ \mathbb{E}[\|\theta_t - \theta_{w_t}^*\|_2^2] & \leq \frac{\epsilon\lambda^2(1-\gamma)L_J}{324L_{\psi}(1+\lambda)}, \quad \text{for all } 0 \leq t \leq T-1, \\ \lambda & = \sqrt{\zeta_{\text{approx}}^{\text{critic}}}, \end{aligned}$$

we have

$$J(\pi^*) - \frac{1}{T} \sum_{t=0}^{T-1} \mathbb{E}[J(\pi_{w_t})] \leq \epsilon + \mathcal{O} \left( \frac{\sqrt{\zeta_{\text{approx}}^{\text{actor}}}}{(1-\gamma)^{1.5}} \right) + \mathcal{O} \left( \frac{\sqrt{\zeta_{\text{approx}}^{\text{critic}}}}{1-\gamma} \right).$$

The total sample complexity is given by

$$\begin{aligned} (B + MT_c)T & = \mathcal{O} \left[ \left( \frac{1}{(1-\gamma)^2\epsilon} + \frac{1}{\epsilon} \log \left( \frac{1}{\epsilon} \right) \right) \frac{1}{(1-\gamma)^2\epsilon} \right] \\ & = \mathcal{O} \left( \frac{1}{(1-\gamma)^4\epsilon^2} \log \left( \frac{1}{\epsilon} \right) \right). \end{aligned}$$

□
